# Supplementary material for: Visualizing Gas Generating Catalysis at the Single Nanoparticle Level via Multimodal Dark Field Microscopy
Source: Research Square preprint supplement (doi:10.21203/rs.3.rs-8791923/v1), 2026-02-09
Supplement: Supplementary file 1 [file 4aa8e1c1aad19bb447709e36.docx]

**Visualizing Gas‑Generating Catalysis at the Single‑Nanoparticle Level via Multimodal Dark‑Field Microscopy**

Yi Wang*, Zhengzhuo Li, Yanhui Gao, Fengjv Shen, Yamin Wang, Le Sun, Xinlong Cai, Jingjing Shen, Quli Fan, Lei Zhang*

State Key Laboratory of Flexible Electronics (LoFE) & Institute of Advanced Materials (IAM), Nanjing University of Posts & Telecommunications, 9 Wenyuan Road, Nanjing 210023, China

Corresponding Author: *iamyiwang@njupt.edu.cn; *iamlzhang@njupt.edu.cn

**Table of Contents**

**S1. Characterization results of MnO2**

**S2. DFM imaging for single MnO2 nanoparticle analysis**

**S3. Control experiments**

**S4. Statistical analysis for nanobubble generation on individual MnO2 nanoparticles**

**S5. Active and non-active fraction of nanoparticles**

**S6. Statistical analysis of ON and OFF states duration time for a single MnO2 nanoparticles with different H2O2 concentrations**

**S7. Tracking the center of single nanobubble with DFM imaging**

**S8. Trajectory of single MnO2 particles along X and Y directions in different solutions**

**S9. Measurement of catalytic reaction in ensemble reaction**

**S10. Statistical analysis of high-velocity duration times**

**S1. Characterization results of MnO2**


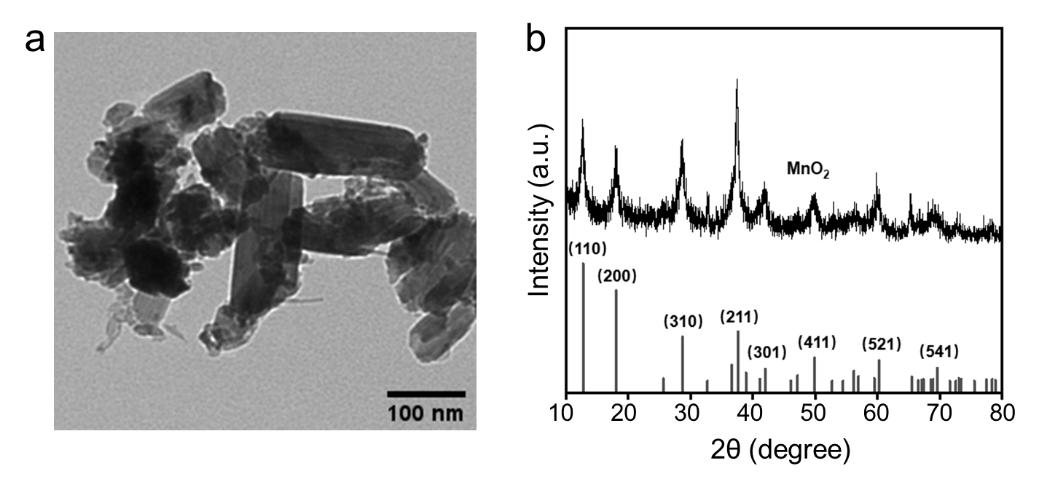


**Figure S1**. Transmission electron microscopy (TEM) image (a) of MnO2. (b) XRD pattern of MnO2, showing characteristic diffraction peaks of α-MnO2 indexed to the tetragonal phase (PDF #44-0141).

**S2. DFM imaging for single MnO2 nanoparticle analysis**


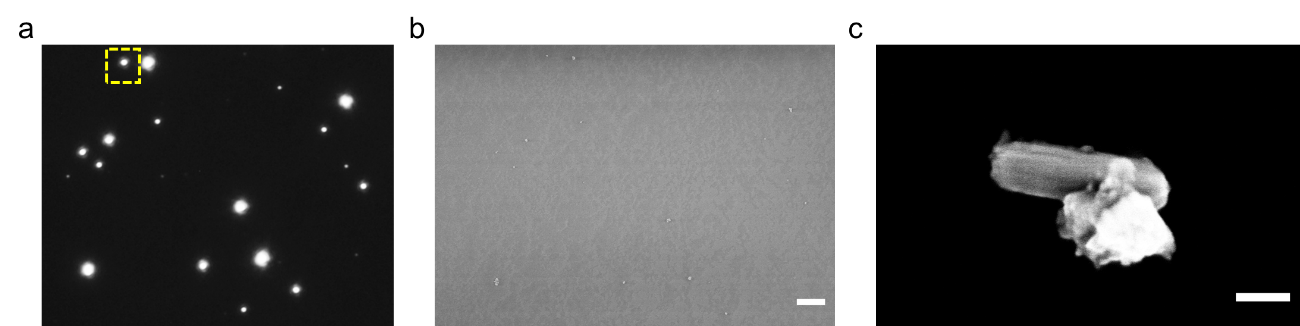


**Figure S2**. Dark-field image of MnO2 particles immobilized on the glass slide, and (b) its corresponding SEM image. Scale bars: 5 μm. (c) SEM image of MnO2 particle labeled in (a). Scale bar: 100 nm.


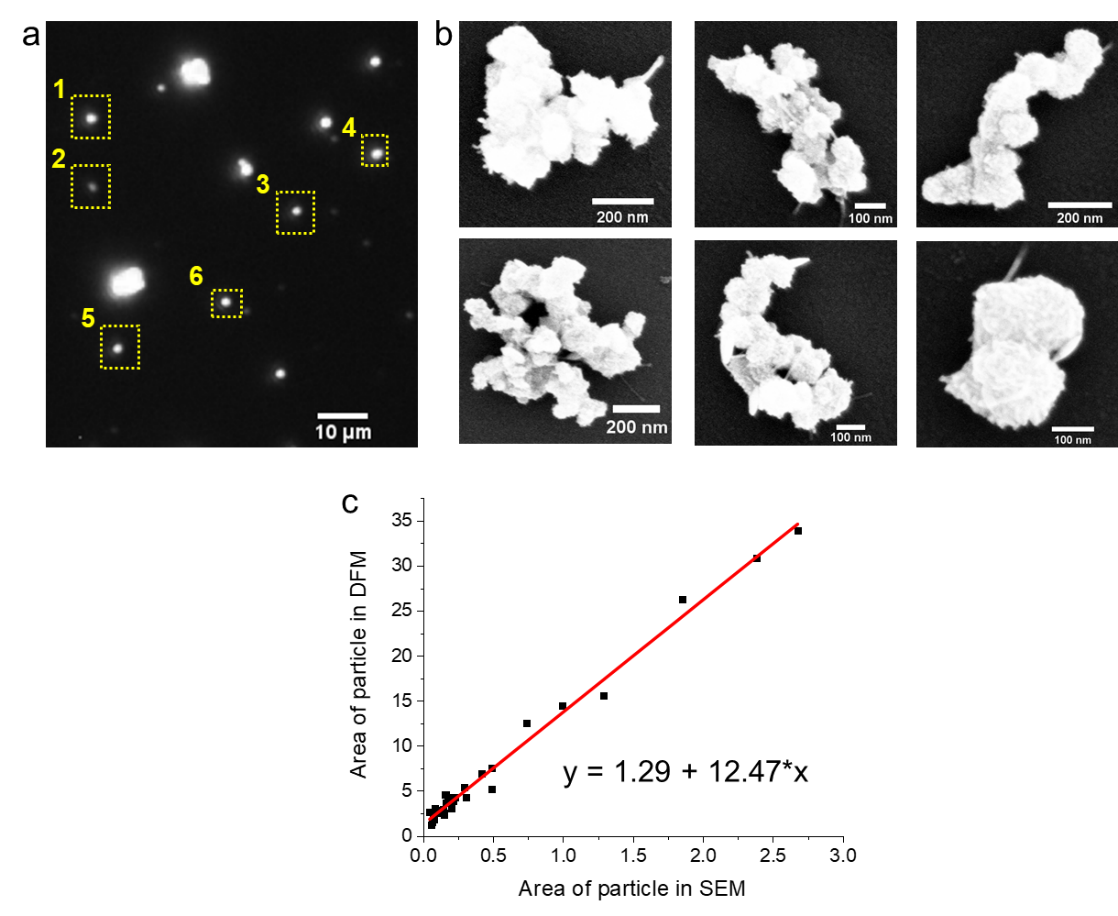


**Figure S3.** (a) The DFM image of MnO2 particles. (b) The corresponding SEM of MnO2 particles in the DFM image. (c) The bright spot variations with different sizes of individual MnO2 particles in DFM image. Solid line represents the linear fitting curve of particle areas in DFM and SEM images.

Based on the local DFM and SEM characterization, it revealed the heterogeneity of MnO2 in the size. In this study, we chose the MnO2 nanoparticles with nm level to study the catalytic reaction.

**S3. Control experiments**


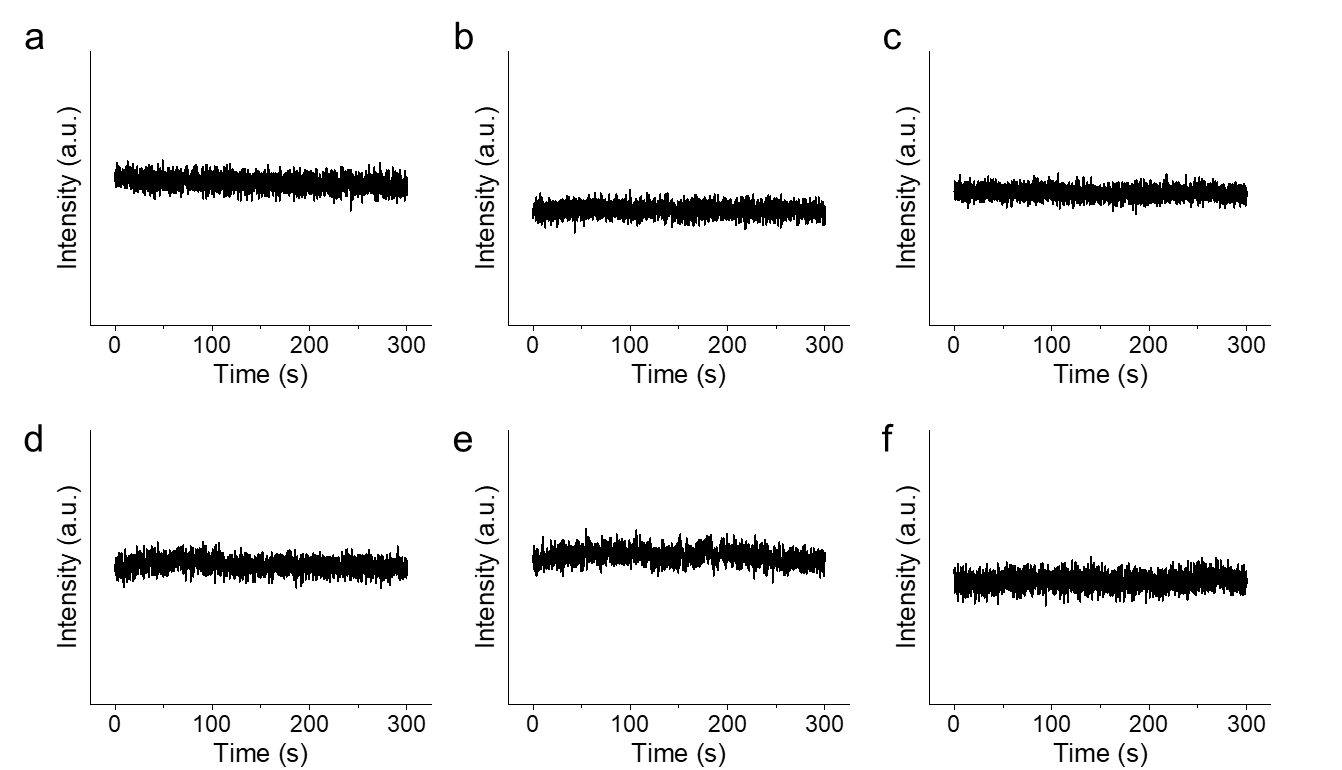


**Figure S4.** The scattering intensity over time of individual MnO2 in DI water. No nanobubble was detected. Therefore, H2O2 is necessary for the formation of nanobubbles.


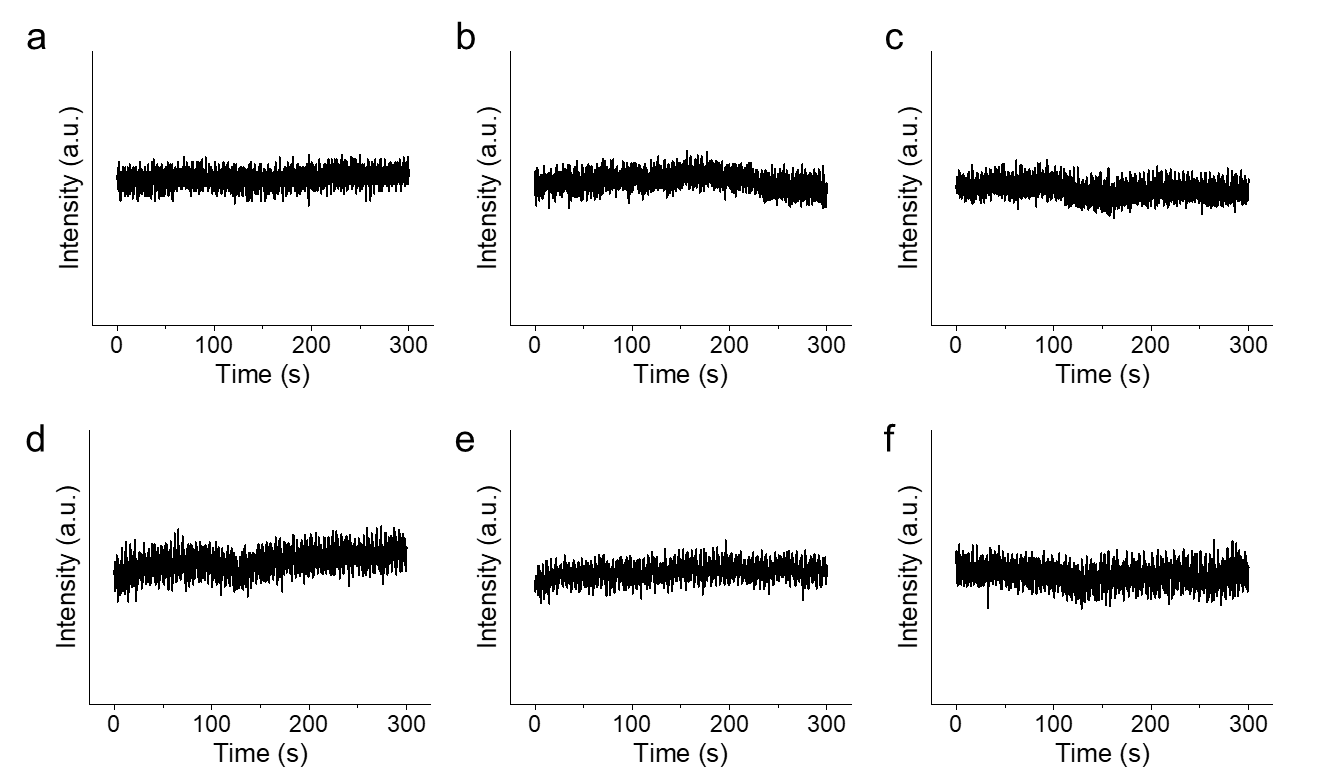


**Figure S5.** The scattering intensity over time of individual MnO2 in 0.01 mM H2O2 and without SDS. No nanobubble was detected. Therefore, H2O2 is necessary for the formation of nanobubbles.


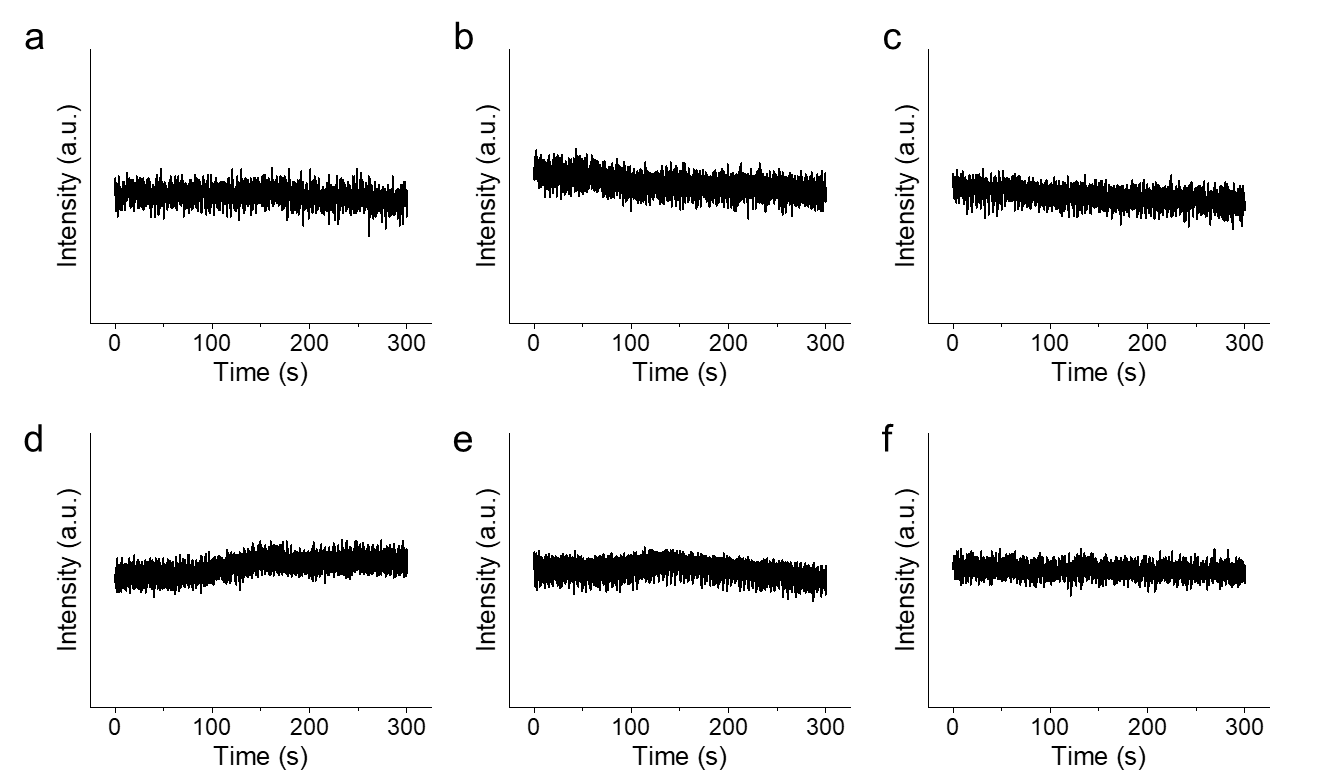


**Figure S6.** The scattering intensity over time of individual MnO2 in 100 mM SDS and without H2O2. No nanobubble was detected. Therefore, SDS is necessary for the formation of nanobubbles.


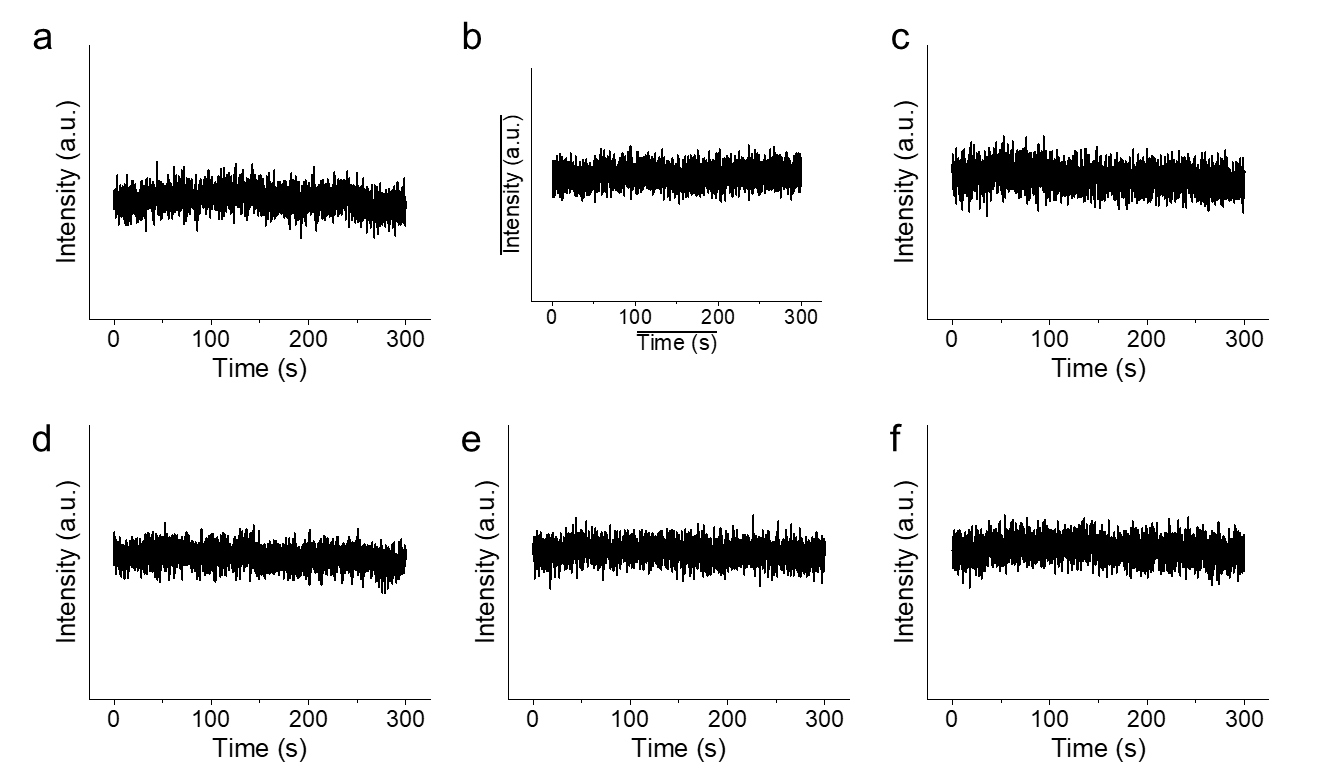


**Figure S7.** The scattering intensity over time of blank area without MnO2 in 50 μM H2O2 and 100 mM SDS. No nanobubble was detected.

**S4. Statistical analysis for nanobubble generation on individual MnO2 nanoparticles**


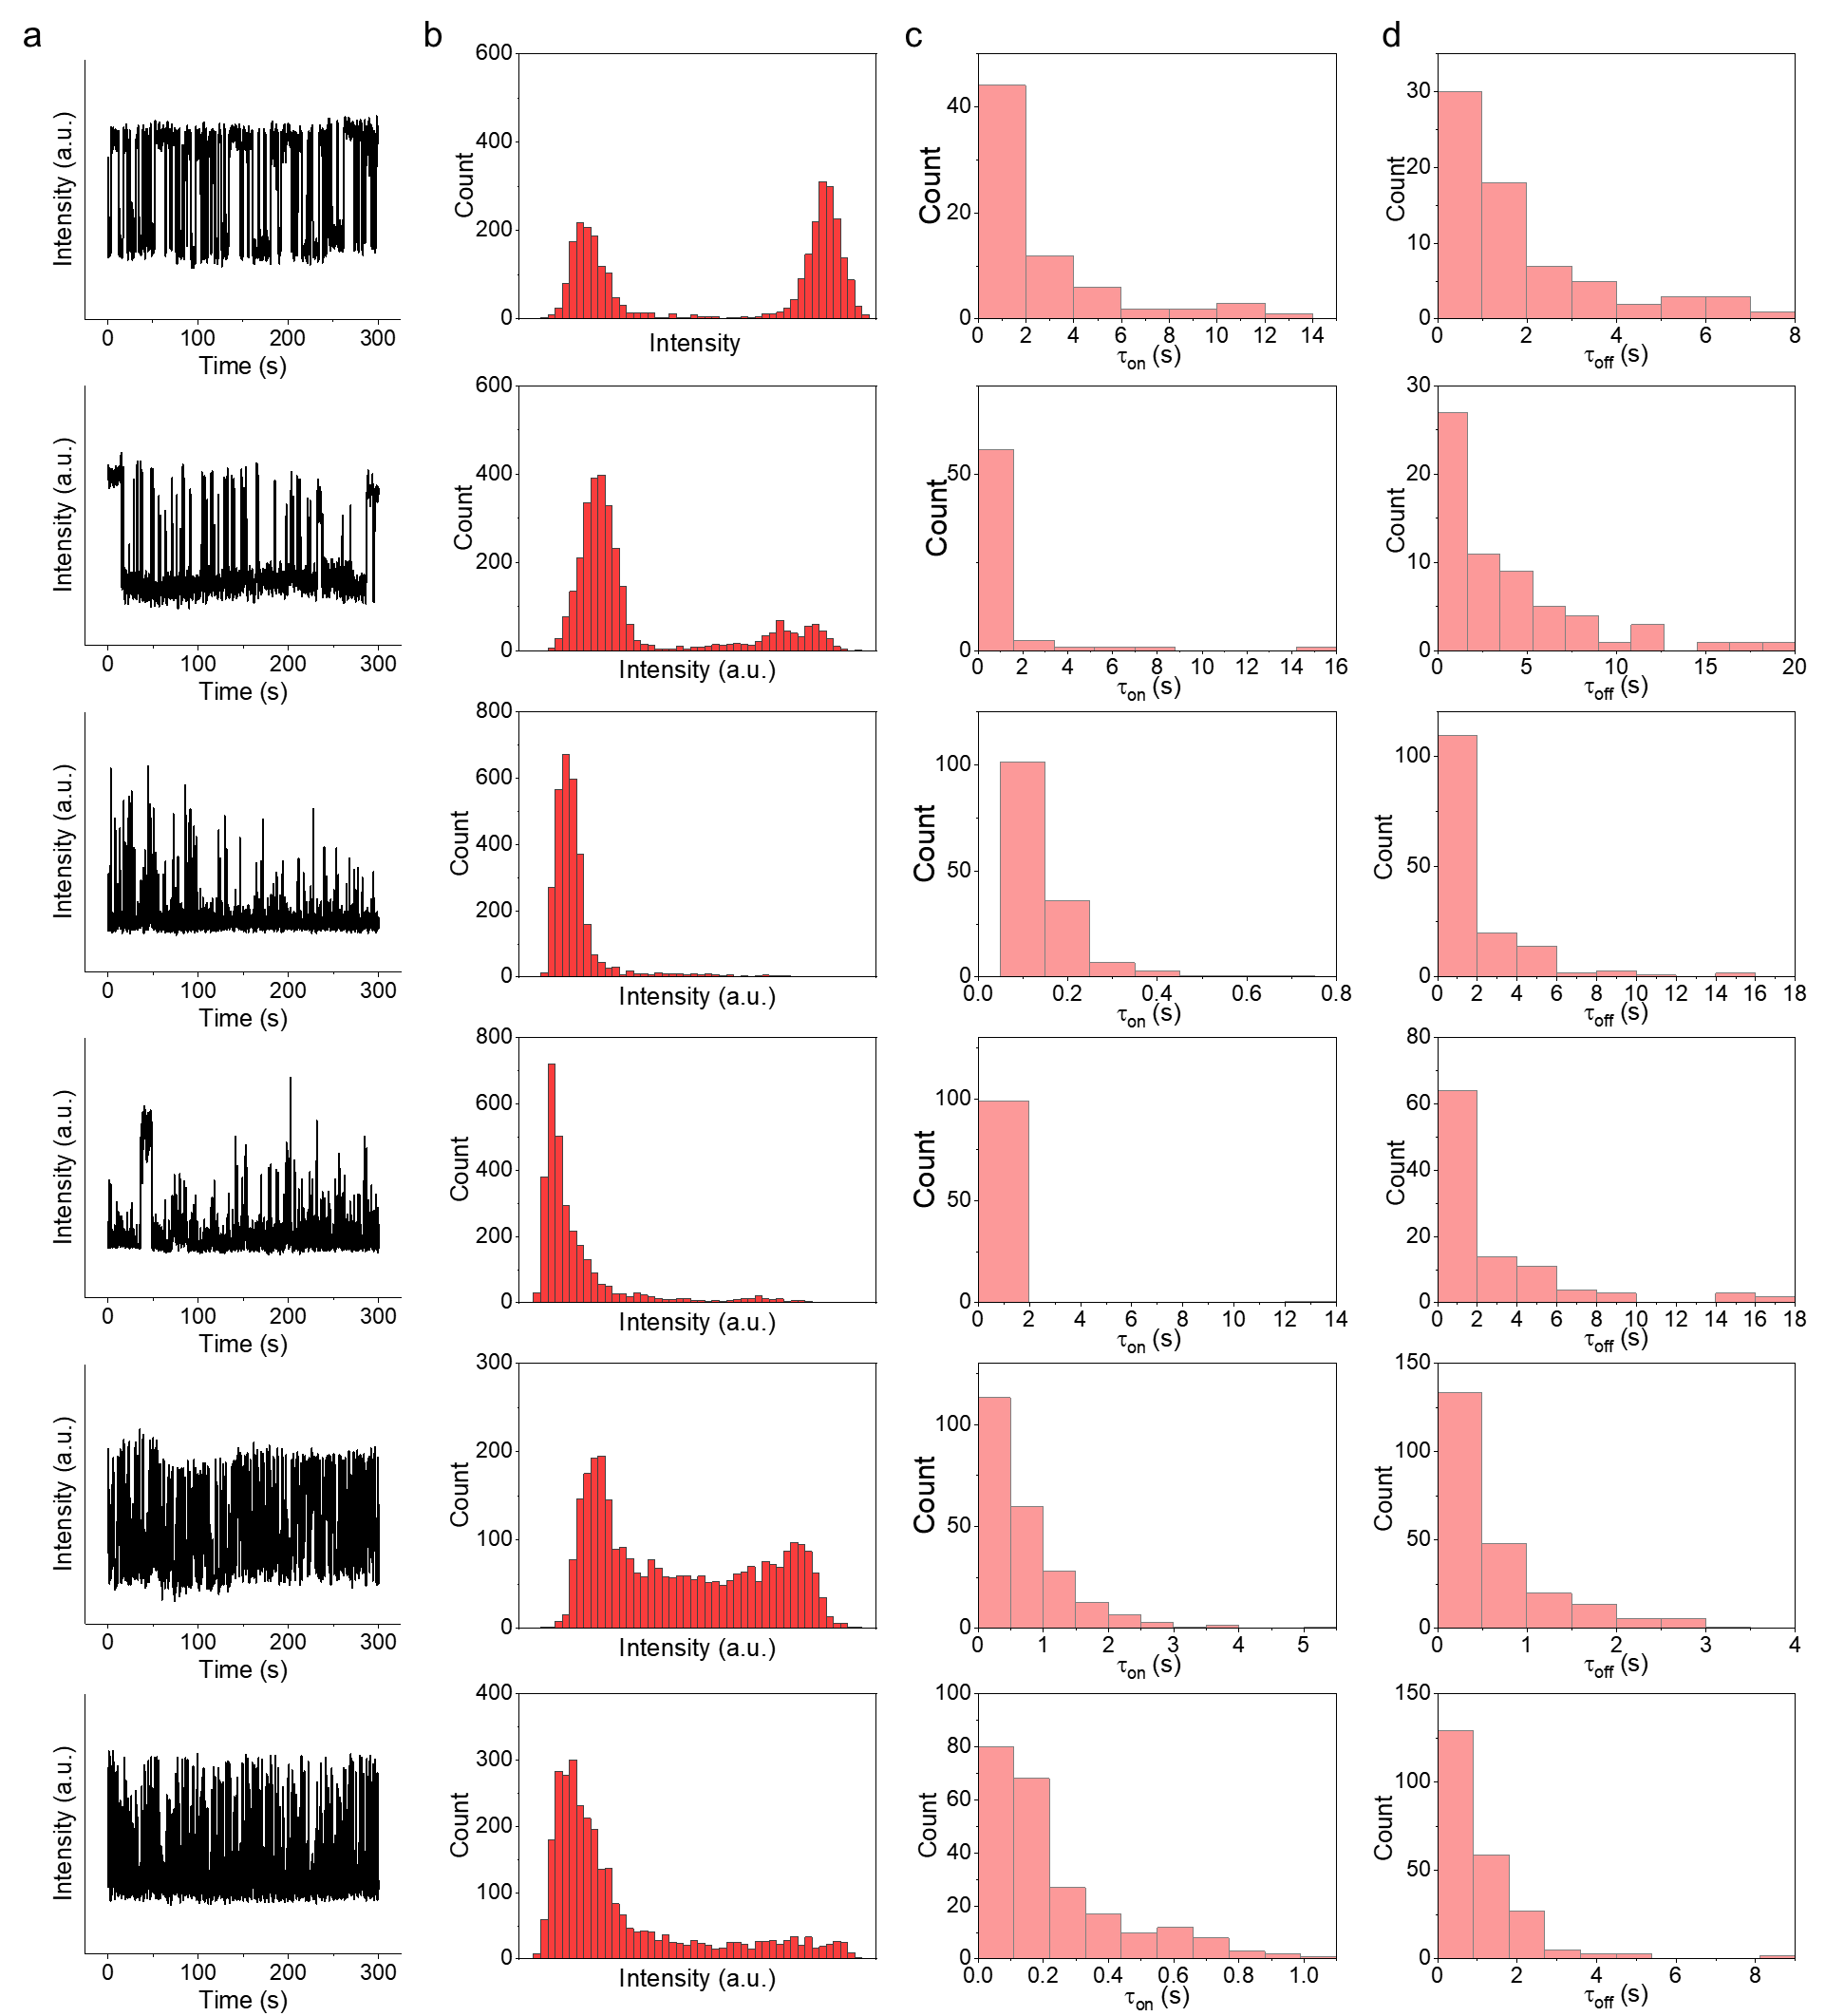


**Figure S8.** (a) The scattering intensity trajectories over time of individual MnO2 nanoparticles in 100 mM SDS and 0.01 mM H2O2. (b) The histograms of the corresponding scattering intensity trajectories. (c) and (d) The histograms of corresponding duration time of ON and OFF states.


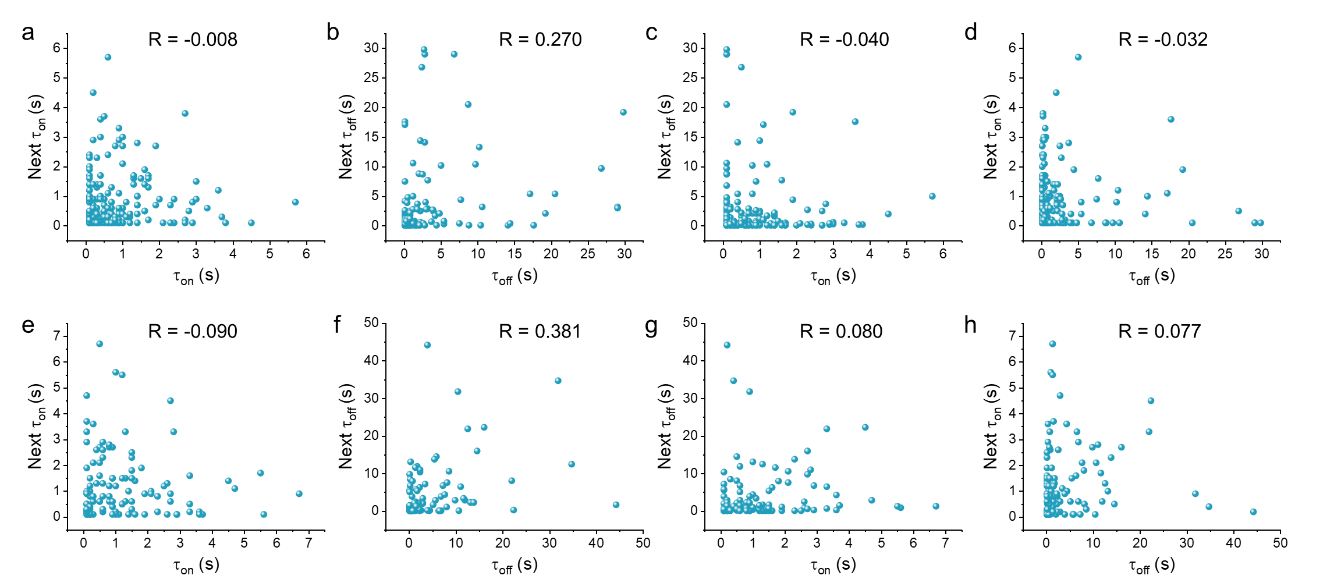


**Figure S9**. Correlations of adjacent on-on, off-off, on-off and off-on duration. The Pearson correlation coefficients R are shown in the corresponding graphs with a linear timescale, respectively.

**S5. Active and non-active fraction of nanoparticles**


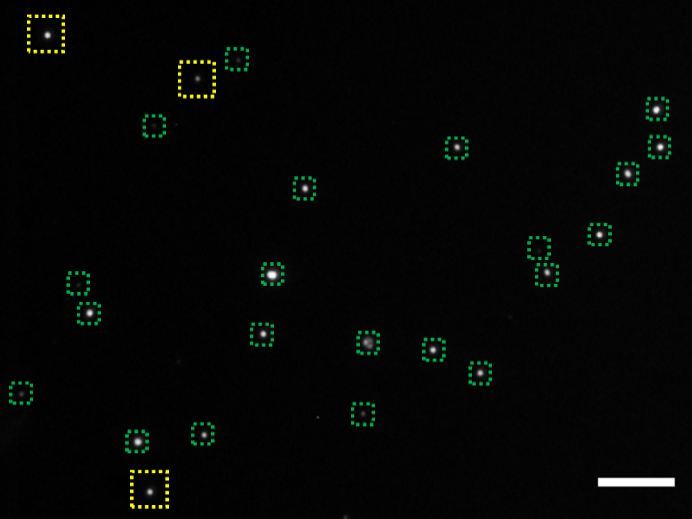


**Figure S10.** The active and non-active fractions of MnO2 nanoparticles marked by different colors. Yellow color marks the active part and green color marks the non-active part. Scale bar: 10 μm.

**S6. Statistical analysis of ON and OFF states duration time for a single MnO2 nanoparticles with different H2O2 concentrations**


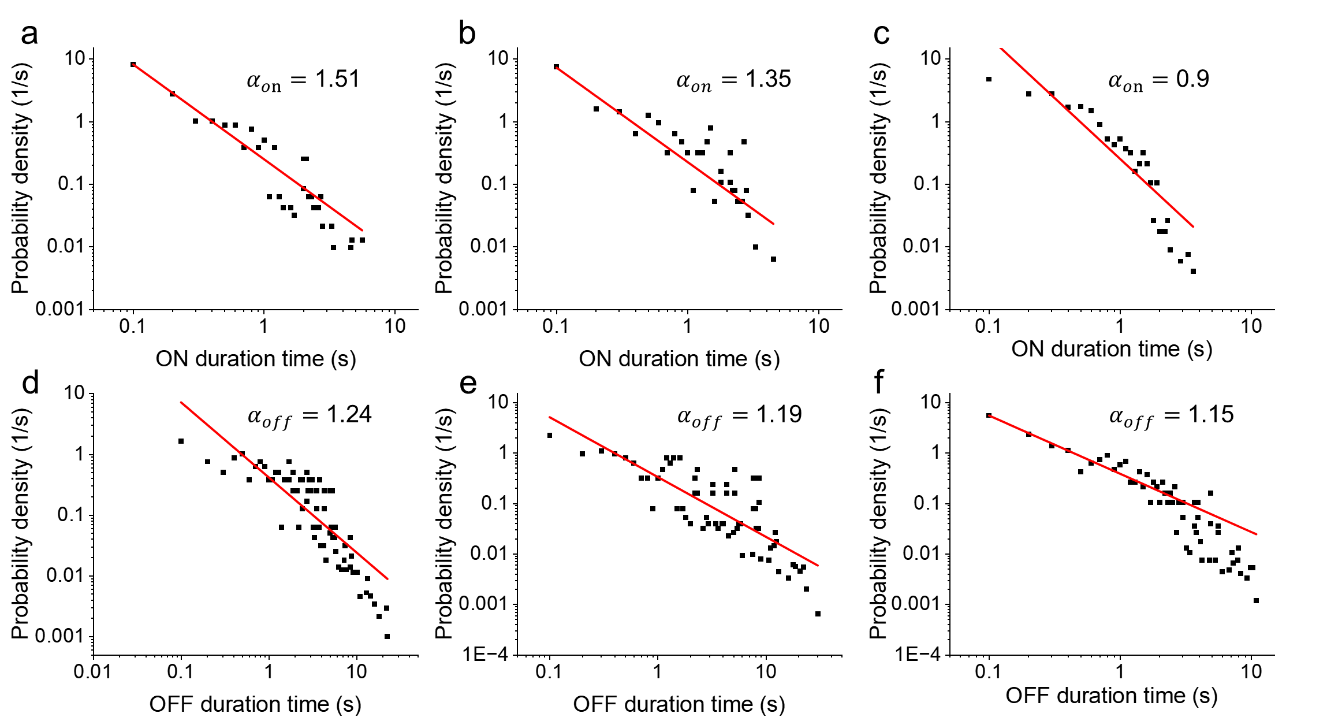


**Figure S11.** Statistical analysis of ON and OFF states duration time for a single MnO2 nanoparticle with different H2O2 concentrations, (a, d) 1 mM, (b, e) 0.5 mM and (c, f) 0.01 mM.

**S7. Tracking the center of single nanobubble with DFM imaging**


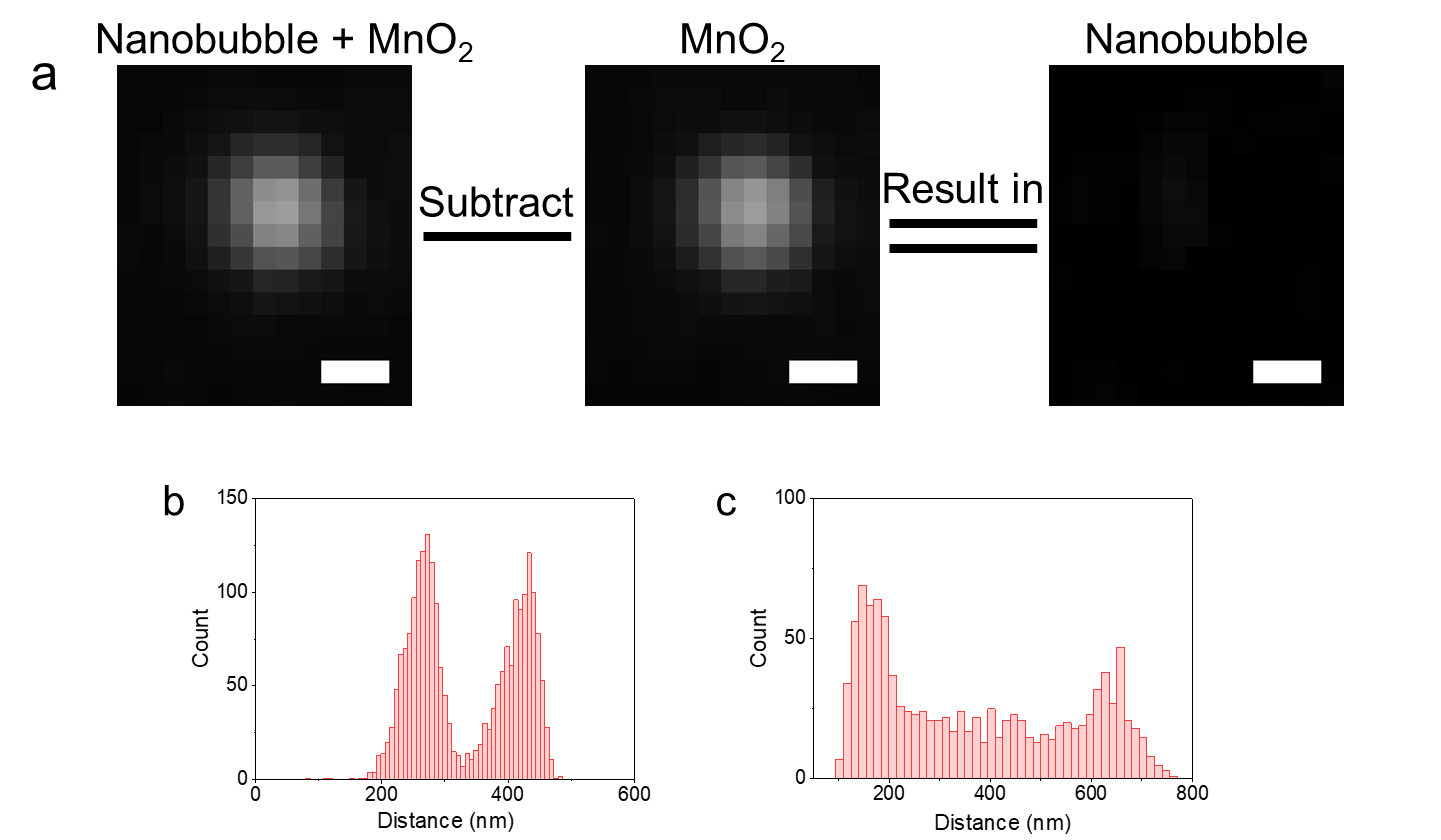


**Figure S12.** (a) Dark-field images of individual MnO2 particle at ON and OFF states. The emission of the nanobubble by subtracting MnO2 particle from the combination of nanobubble and MnO2. (b) (c) Histograms of the distance distributions of individual MnO2 particles.

To obtain the scattering image of nanobubble only, we subtracted the scattering signal of the MnO2 nanoparticle from the combined signal of MnO2 nanoparticle and nanobubbles as shown in Figure S14a. After separation of the scattering images, the images for both MnO2 nanoparticle and the nanobubble are fitted with 2D Gaussian function. The centers of the fitting results are as the geometric centers of MnO2 nanoparticles and nanobubbles, separately. The geometric center of MnO2 nanoparticle is as the initial location, and the relative location of the nanobubble to the MnO2 nanoparticle is identified clearly.


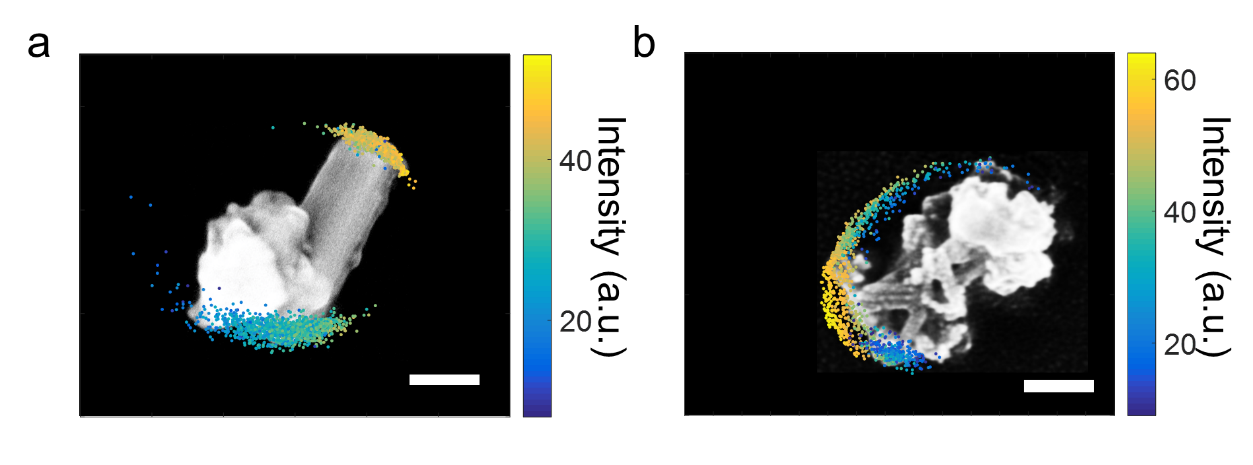


**Figure S13.** Diagrams of nanobubble distributions on the individual MnO2 particles showing different intensities at different locations.

**S8. Trajectory of single MnO2 particles along X and Y directions under different concentration of H2O2 in different surfactant solutions**

To quantify the motion dynamics of individual nanoparticles, we calculated their instantaneous velocities by analyzing sequential dark-field microscopy frames. The position of each nanoparticle in consecutive frames was determined with *Trackmate* Command of ImageJ. As illustrated in Figure 4a, with the initial particle location at time t₀ set as the origin, the displacement between frames was then divided by the interframe time interval to obtain the instantaneous velocity.

The displacement between consecutive time points, referred to as the movement distance (MD), was calculated as:

Where and denote the coordinates of the particle on the two-dimensional substrate at time . The instantaneous velocity  was then derived as:

Here,  corresponds to the inter-frame time interval, which was 0.1 s under the current imaging conditions


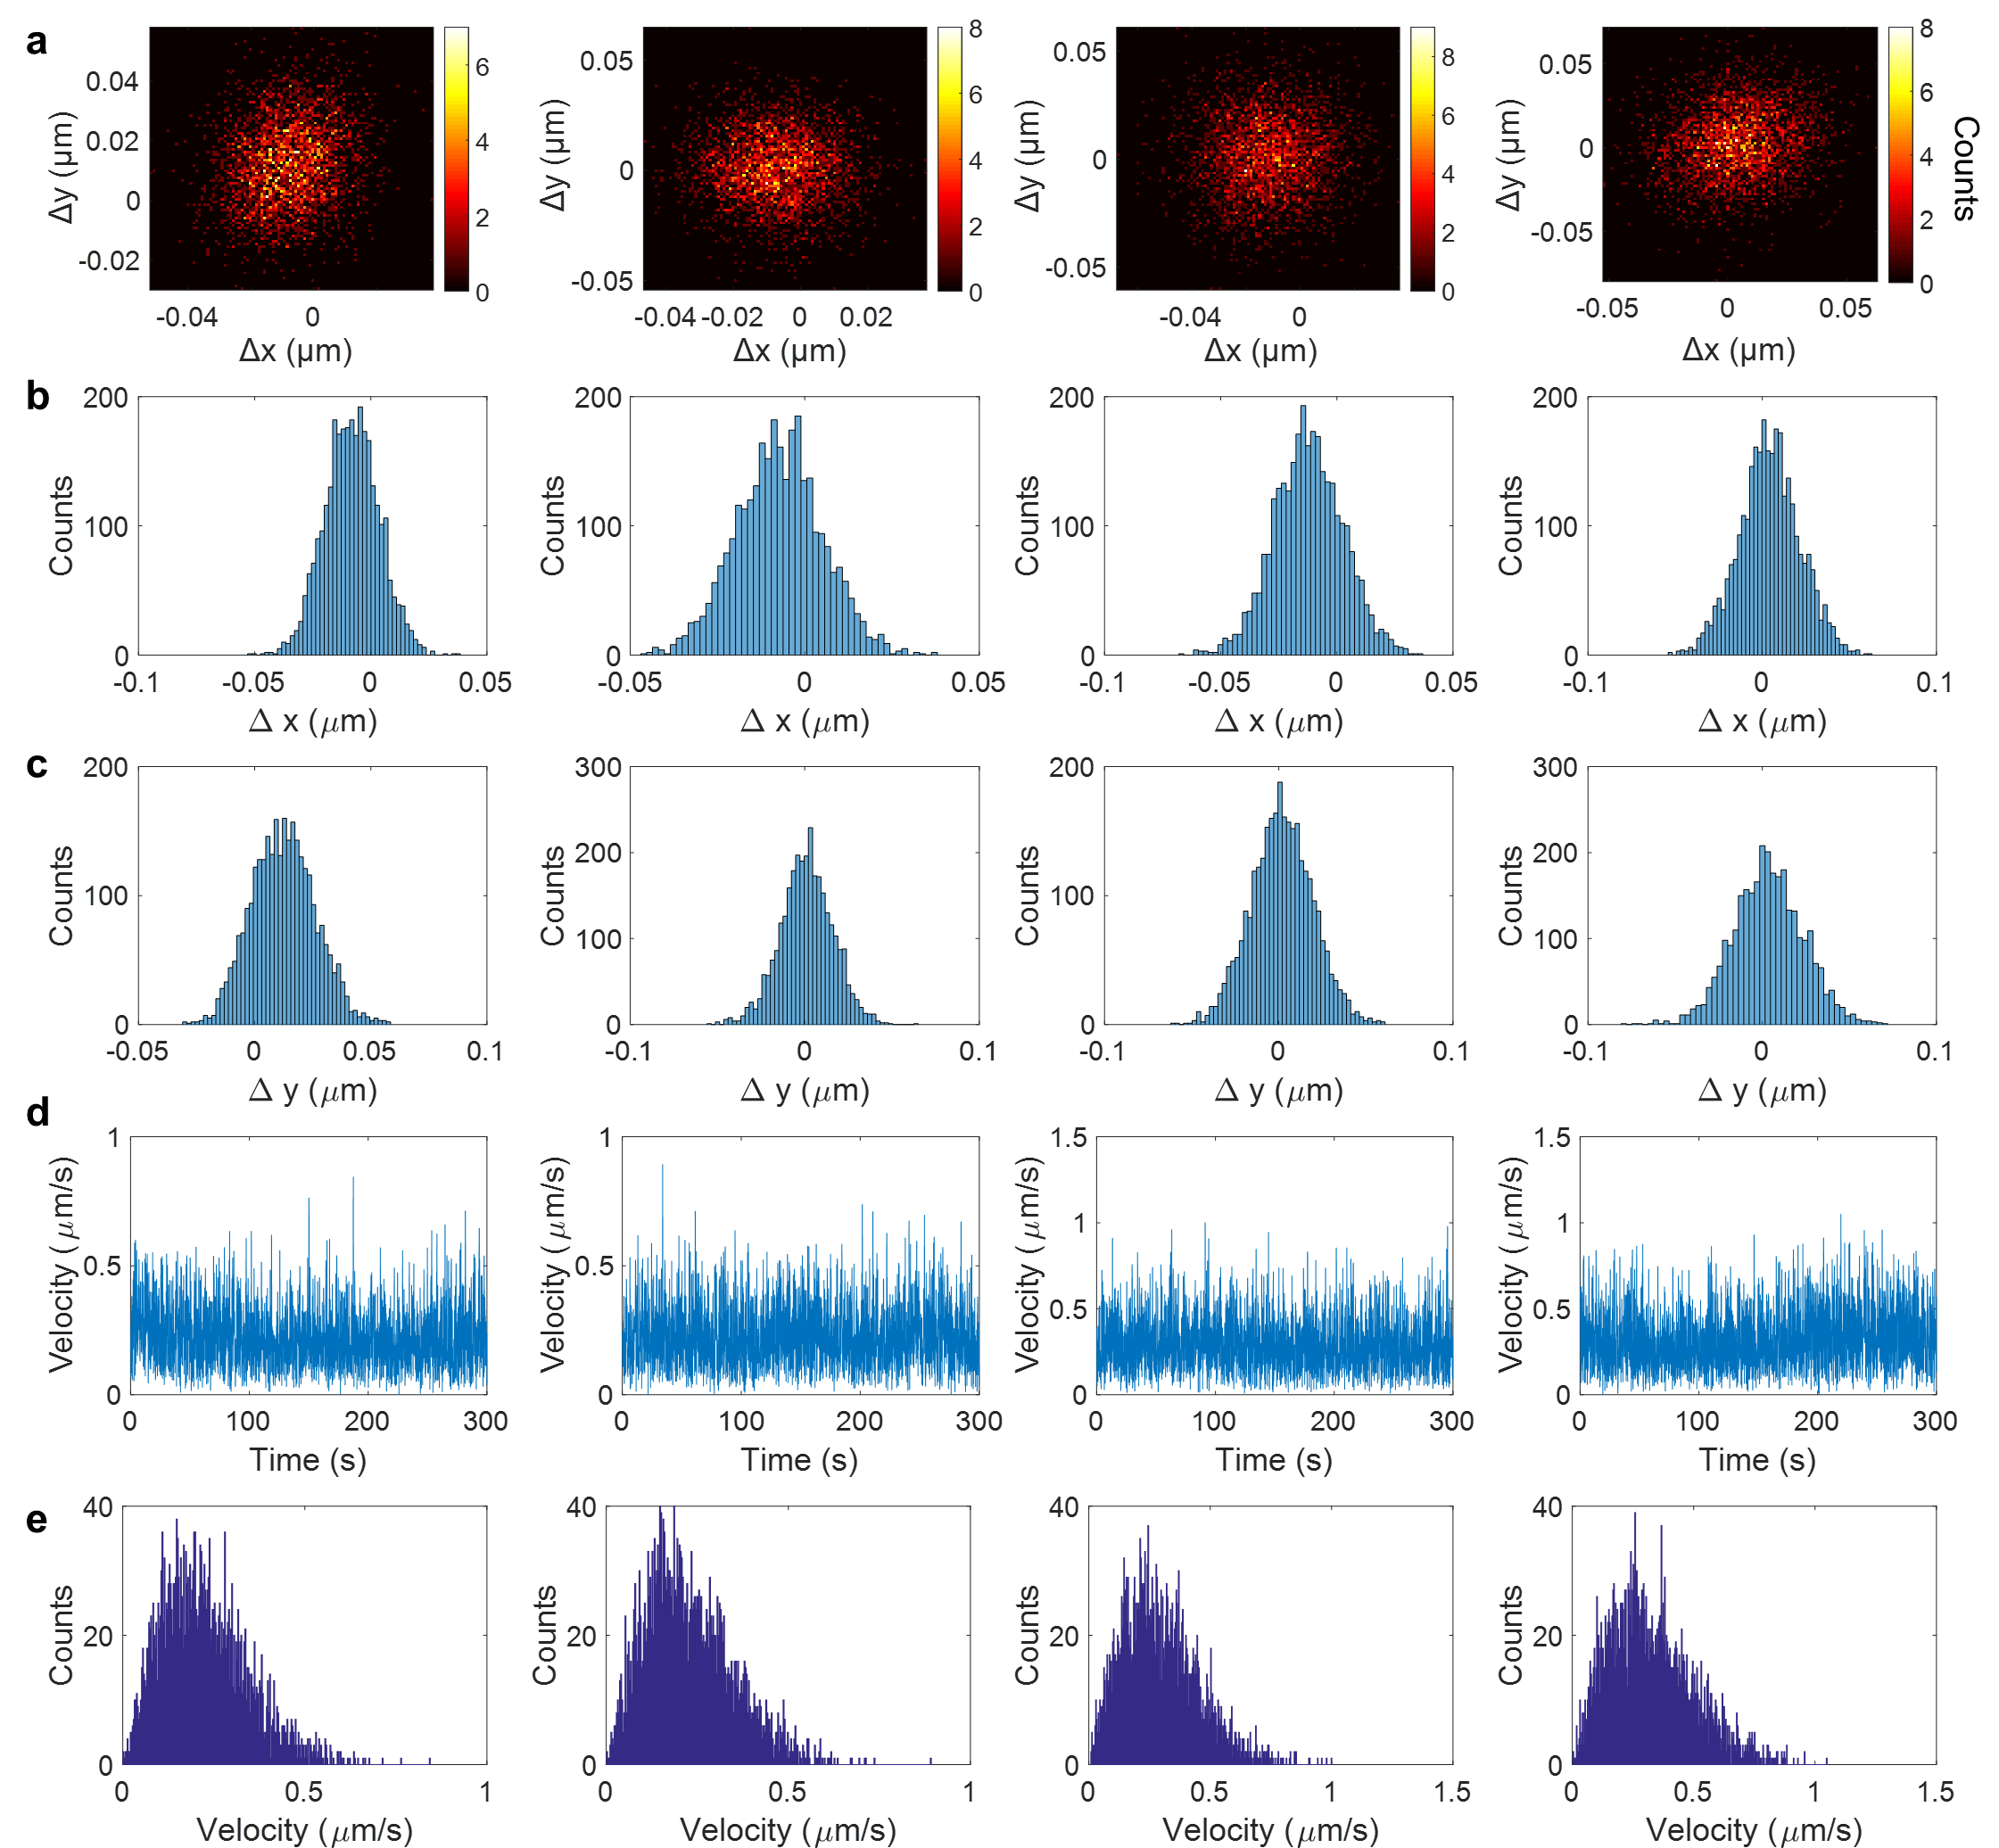


**Figure S14.** (a) Trajectory of single MnO2 particle on the glass slide surface along X and Y directions over 300 s in the absence of H2O2. The corresponding probability distributions of the X displacements (b) and Y displacements (c) with single peaks. (d) The calculated time-lapsed velocity of the attached MnO2 particle from the 2D displacements. (e) The corresponding probability distribution of the velocity.


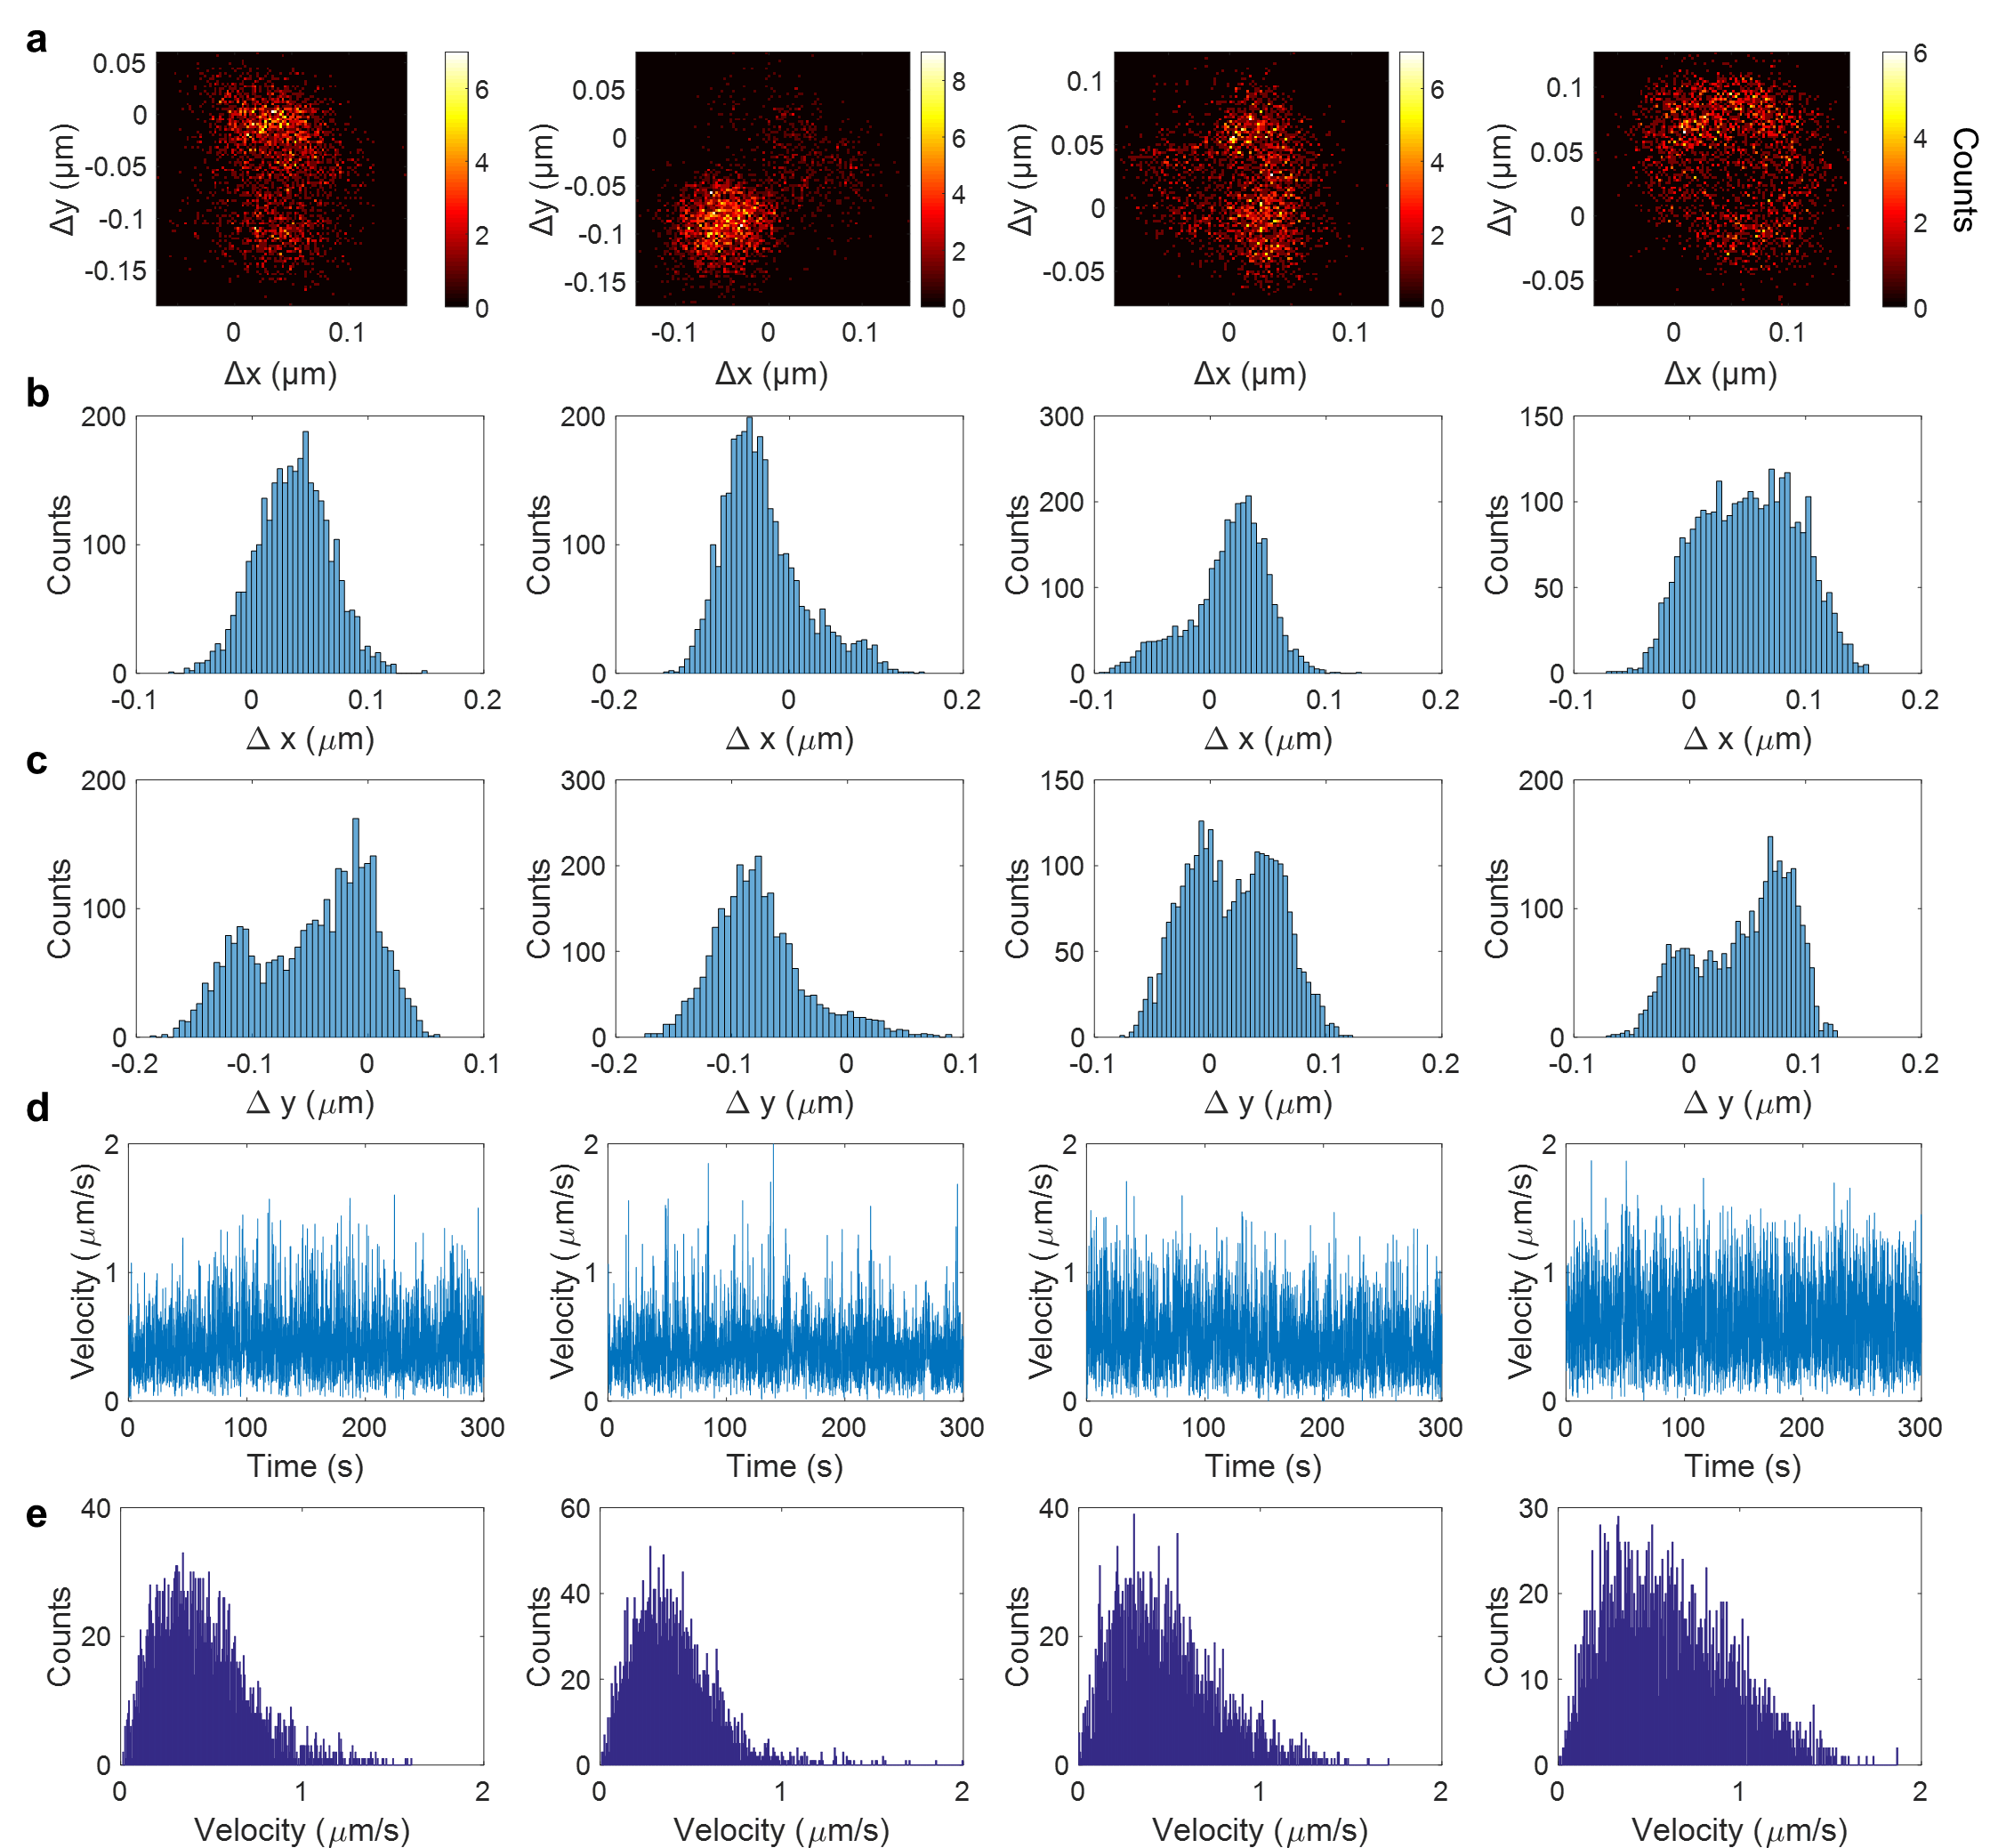


**Figure S15.** (a) Trajectory of single MnO2 particle on the glass slide surface along X and Y directions over 300 s in the presence of 0.01 mM H2O2 and SDS solution. The corresponding probability distributions of the X displacements (b) and Y displacements (c) with single peaks. (d) The calculated time-lapsed velocity of the attached MnO2 particle from the 2D displacements. (e) The corresponding probability distribution of the velocity.


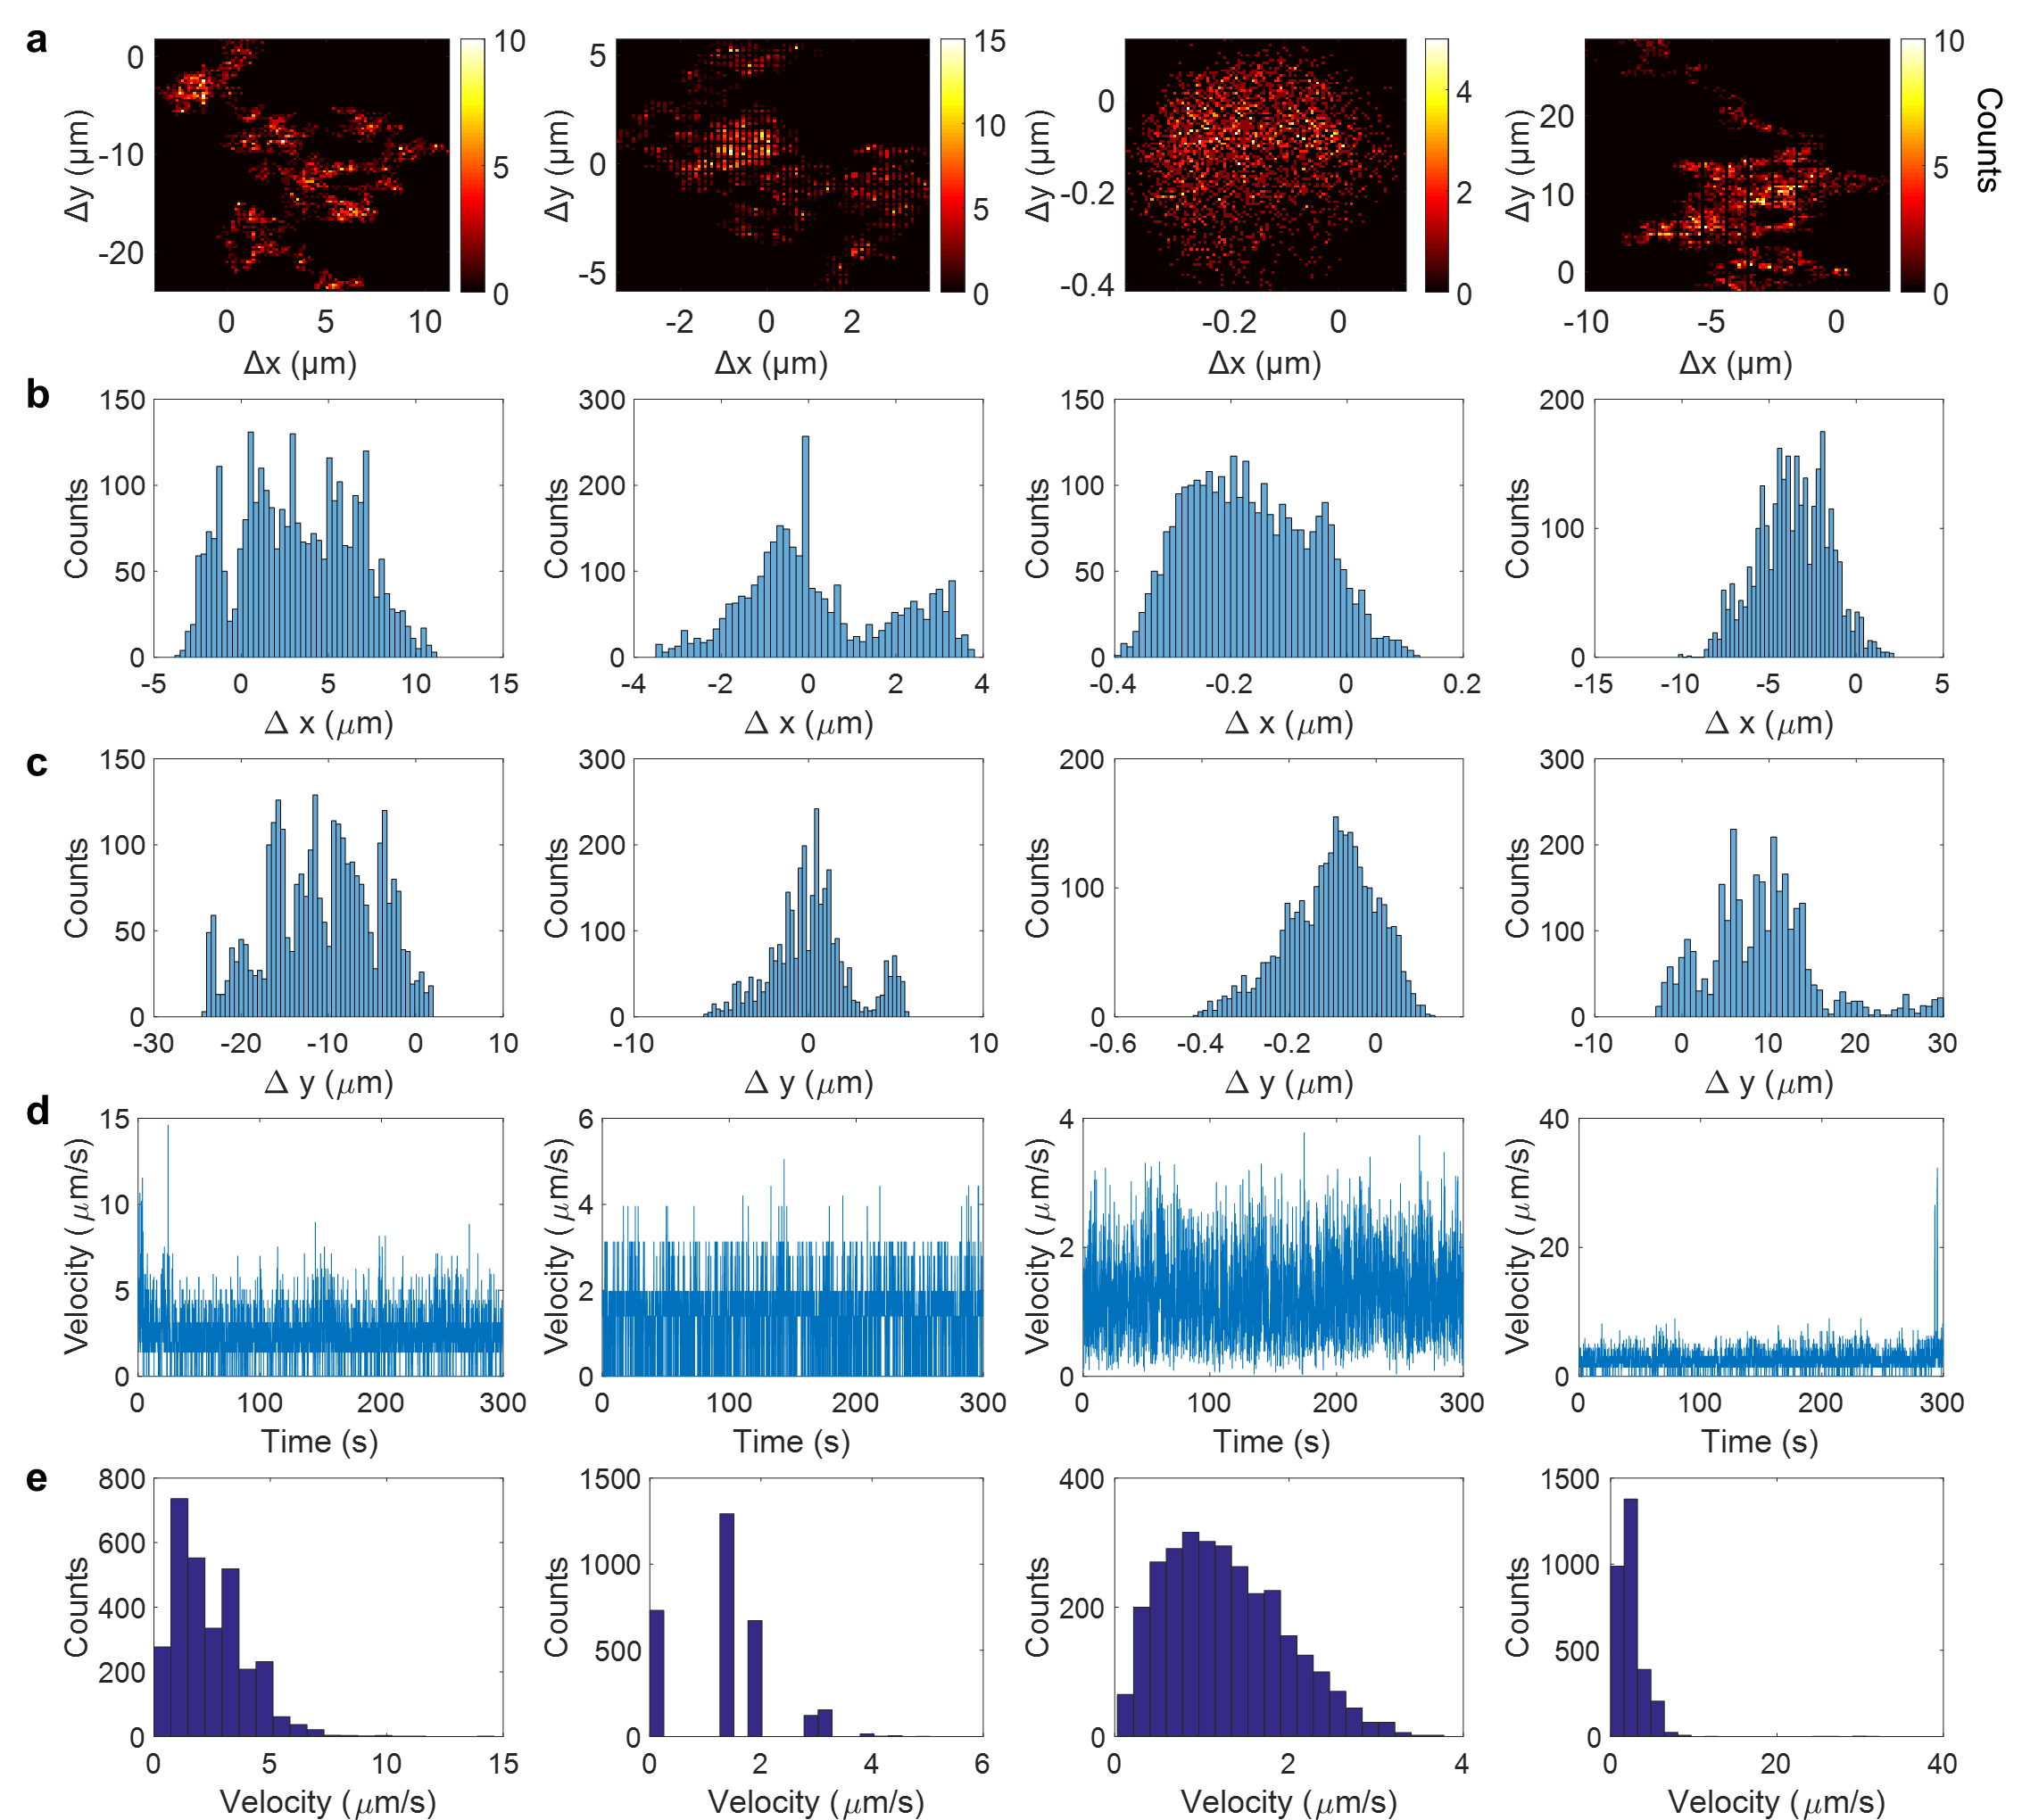


**Figure S16.** (a) Trajectory of single MnO2 particle on the glass slide surface along X and Y directions over 300 s in the presence of 0.1 mM H2O2 and SDS solution. The corresponding probability distributions of the X displacements (b) and Y displacements (c) with single peaks. (d) The calculated time-lapsed velocity of the attached MnO2 particle from the 2D displacements. (e) The corresponding probability distribution of the velocity.


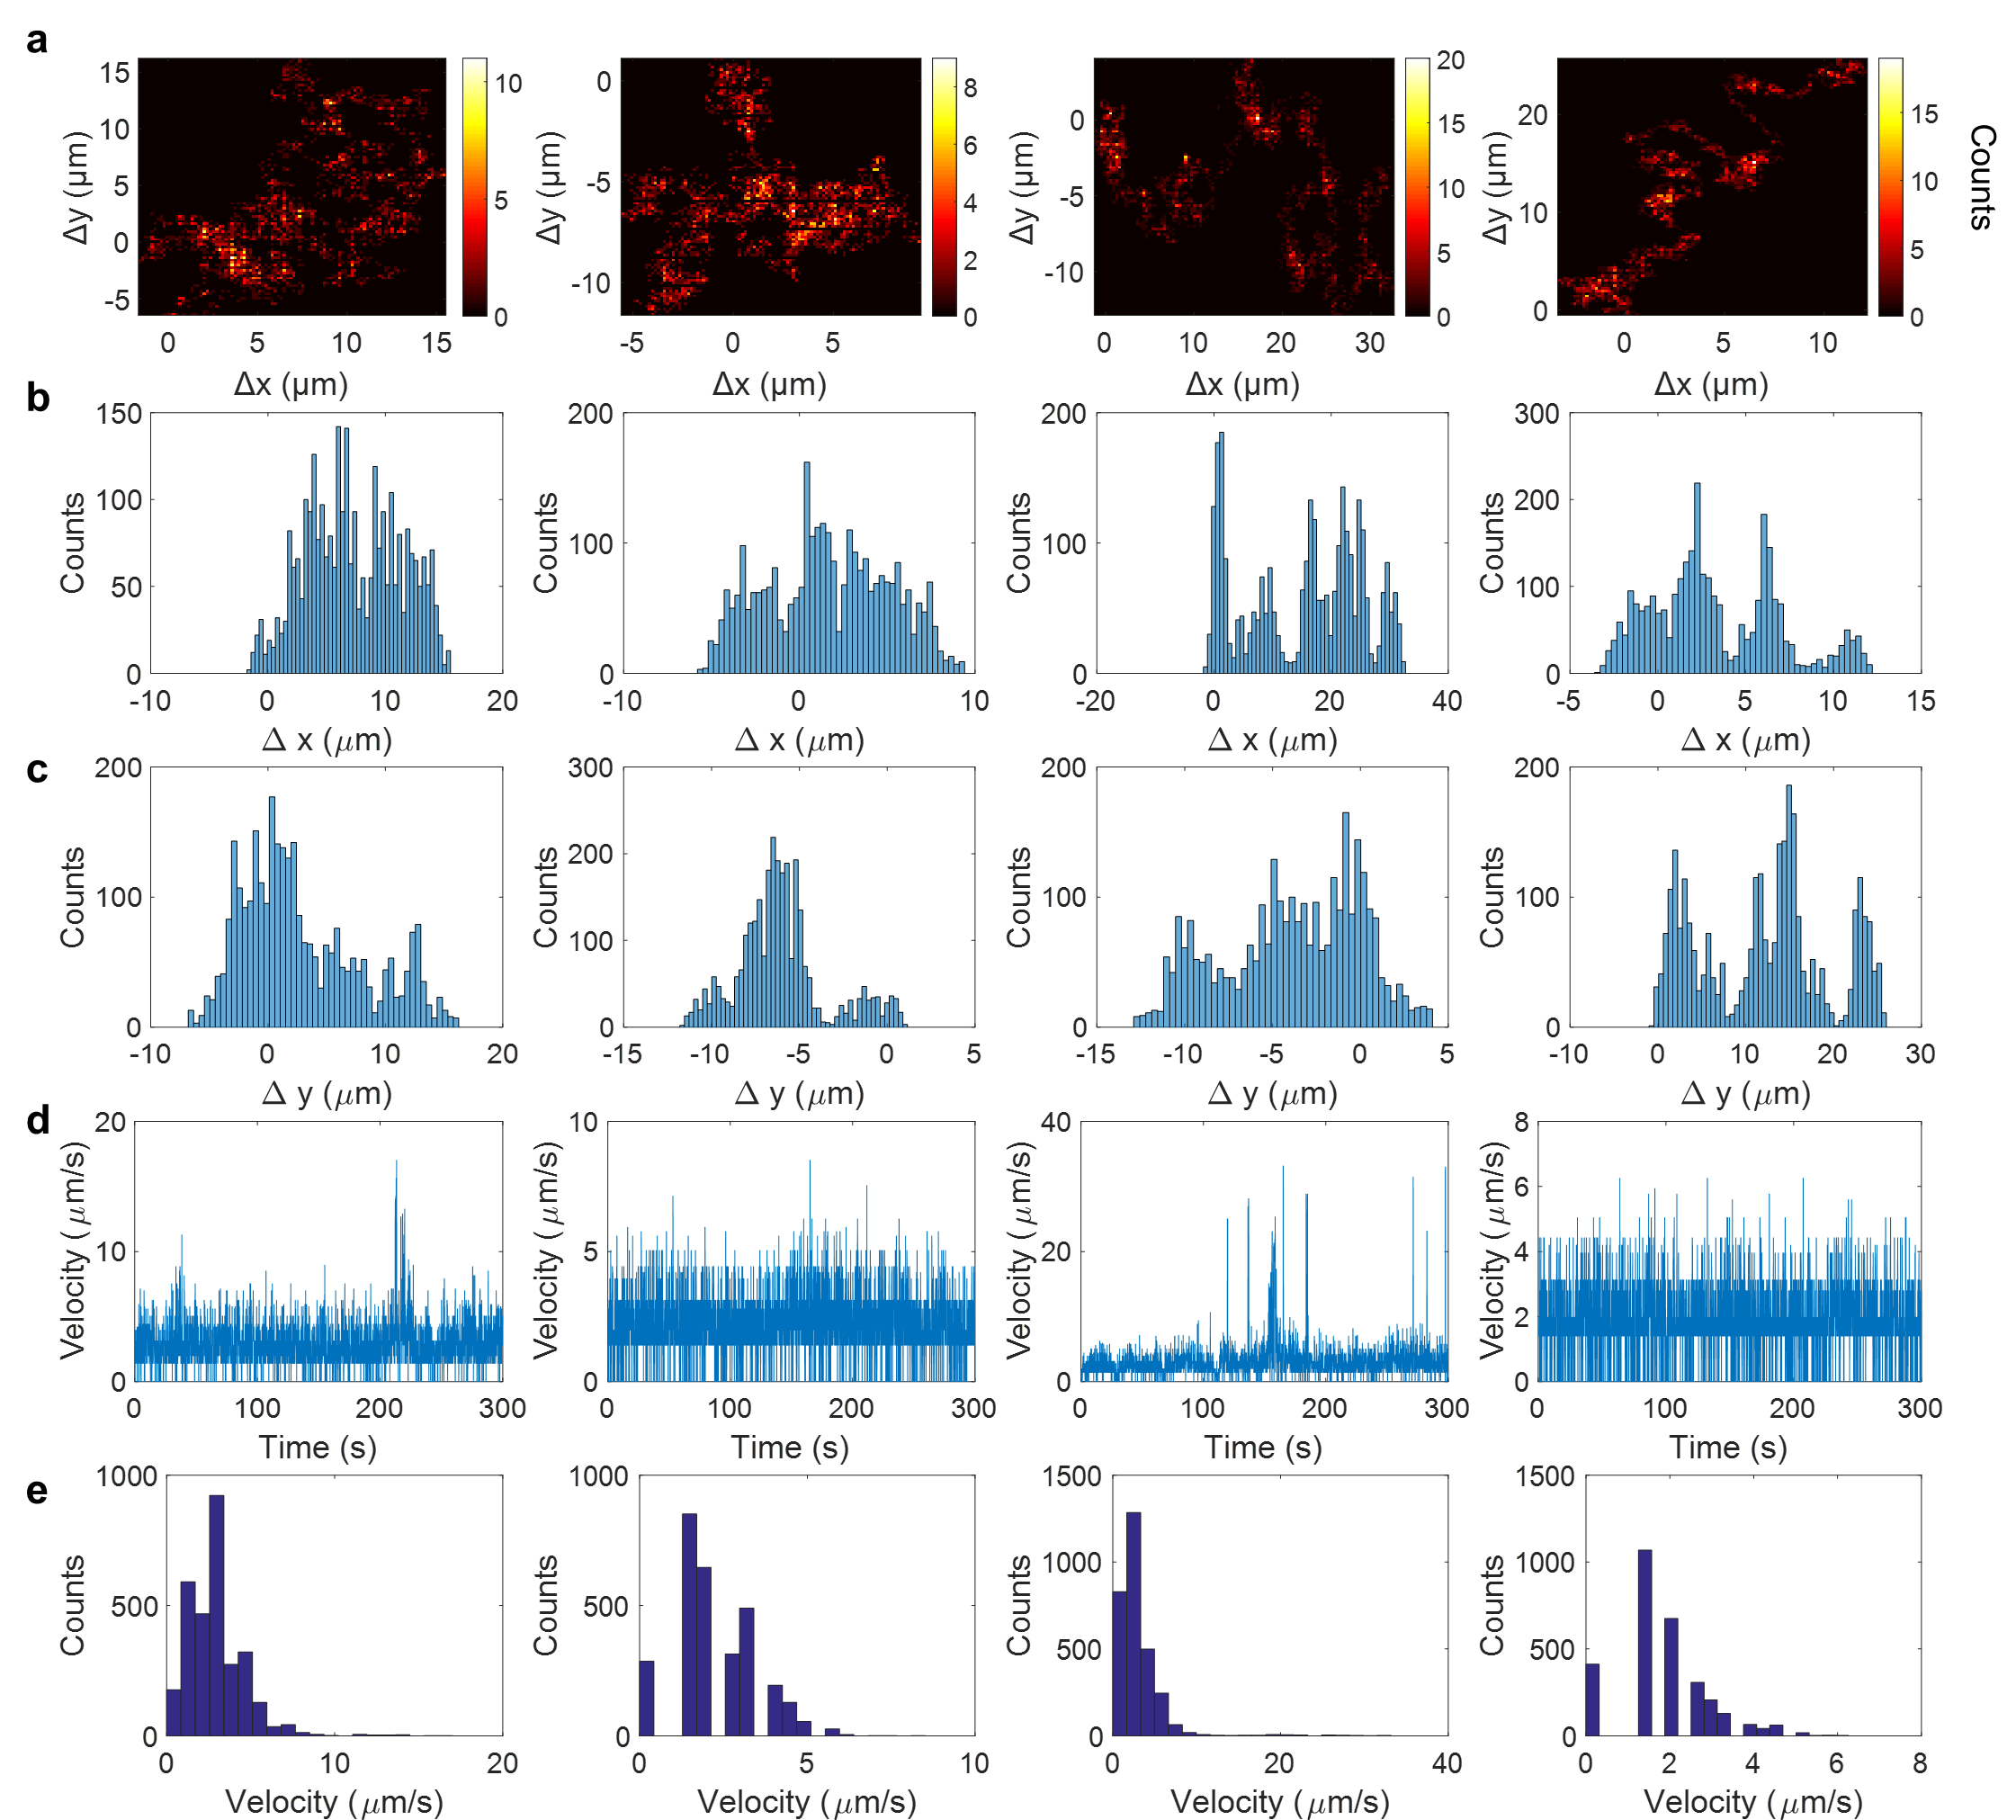


**Figure S17.** (a) Trajectory of single MnO2 particle on the glass slide surface along X and Y directions over 300 s in the presence of 1 mM H2O2 and SDS solution. The corresponding probability distributions of the X displacements (b) and Y displacements (c) with single peaks. (d) The calculated time-lapsed velocity of the attached MnO2 particle from the 2D displacements. (e) The corresponding probability distribution of the velocity.


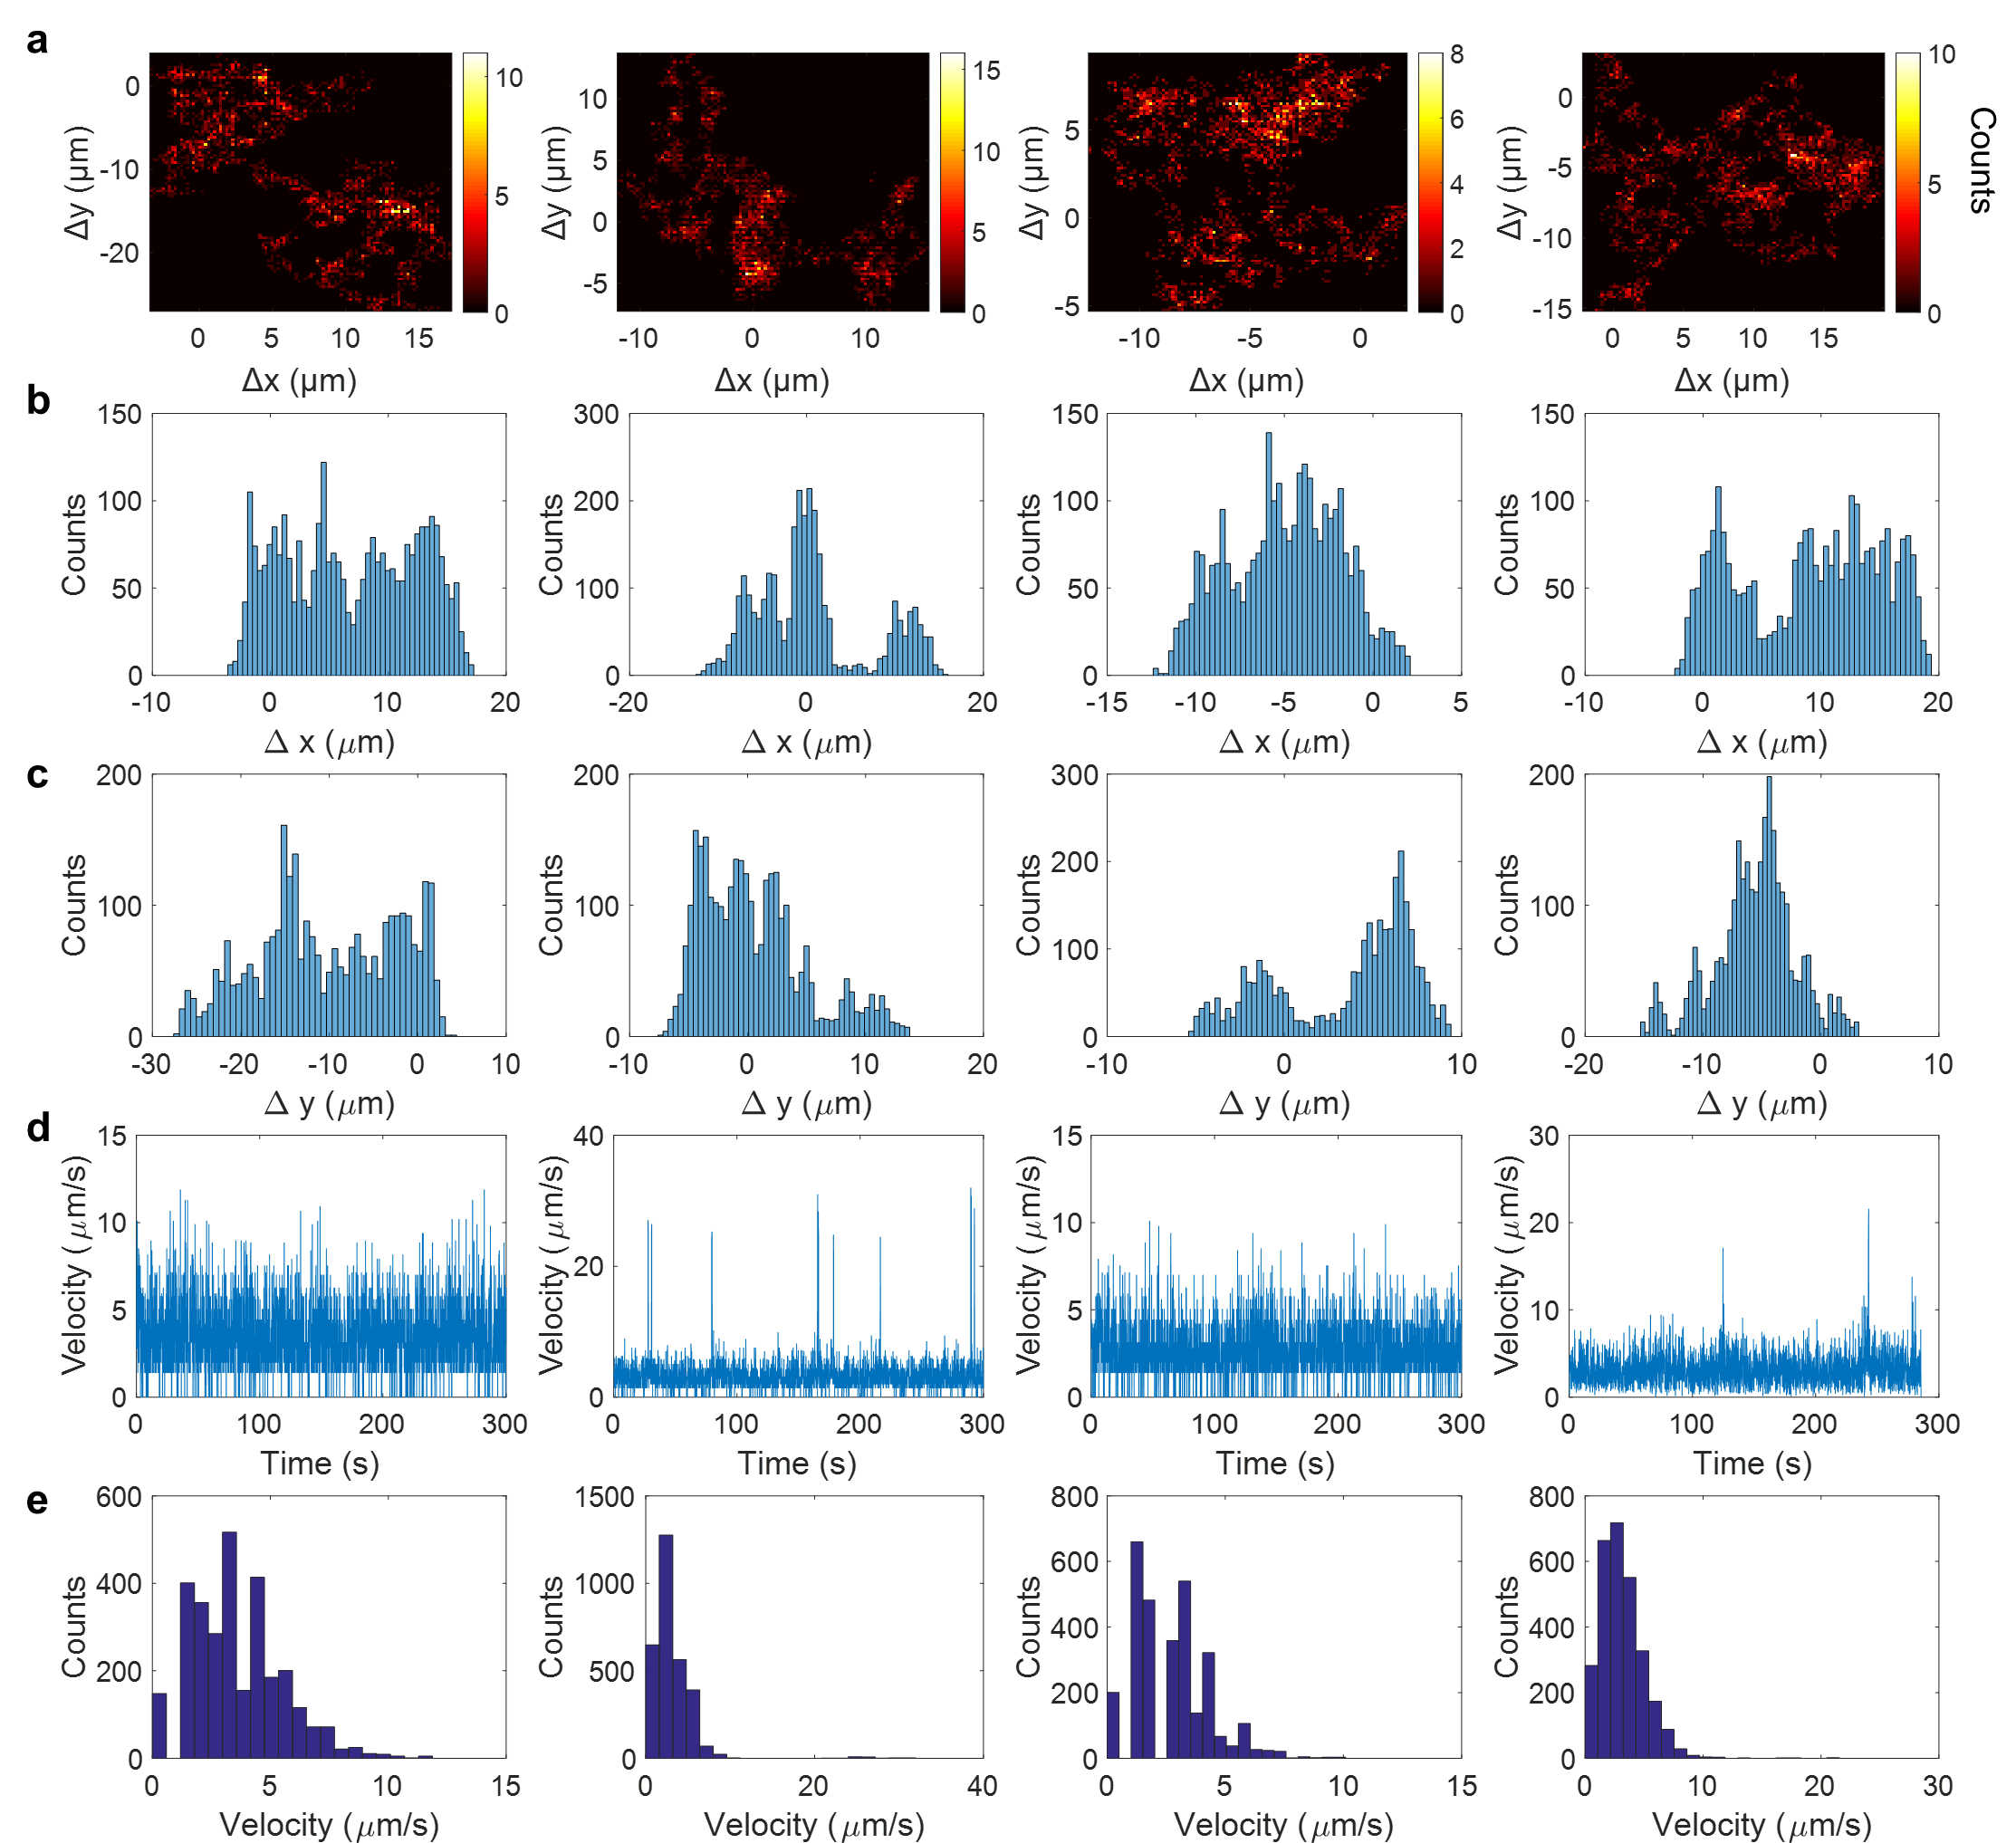


**Figure S18.** (a) Trajectory of single MnO2 particle on the glass slide surface along X and Y directions over 300 s in the presence of 10 mM H2O2 and SDS solution. The corresponding probability distributions of the X displacements (b) and Y displacements (c) with single peaks. (d) The calculated time-lapsed velocity of the attached MnO2 particle from the 2D displacements. (e) The corresponding probability distribution of the velocity.
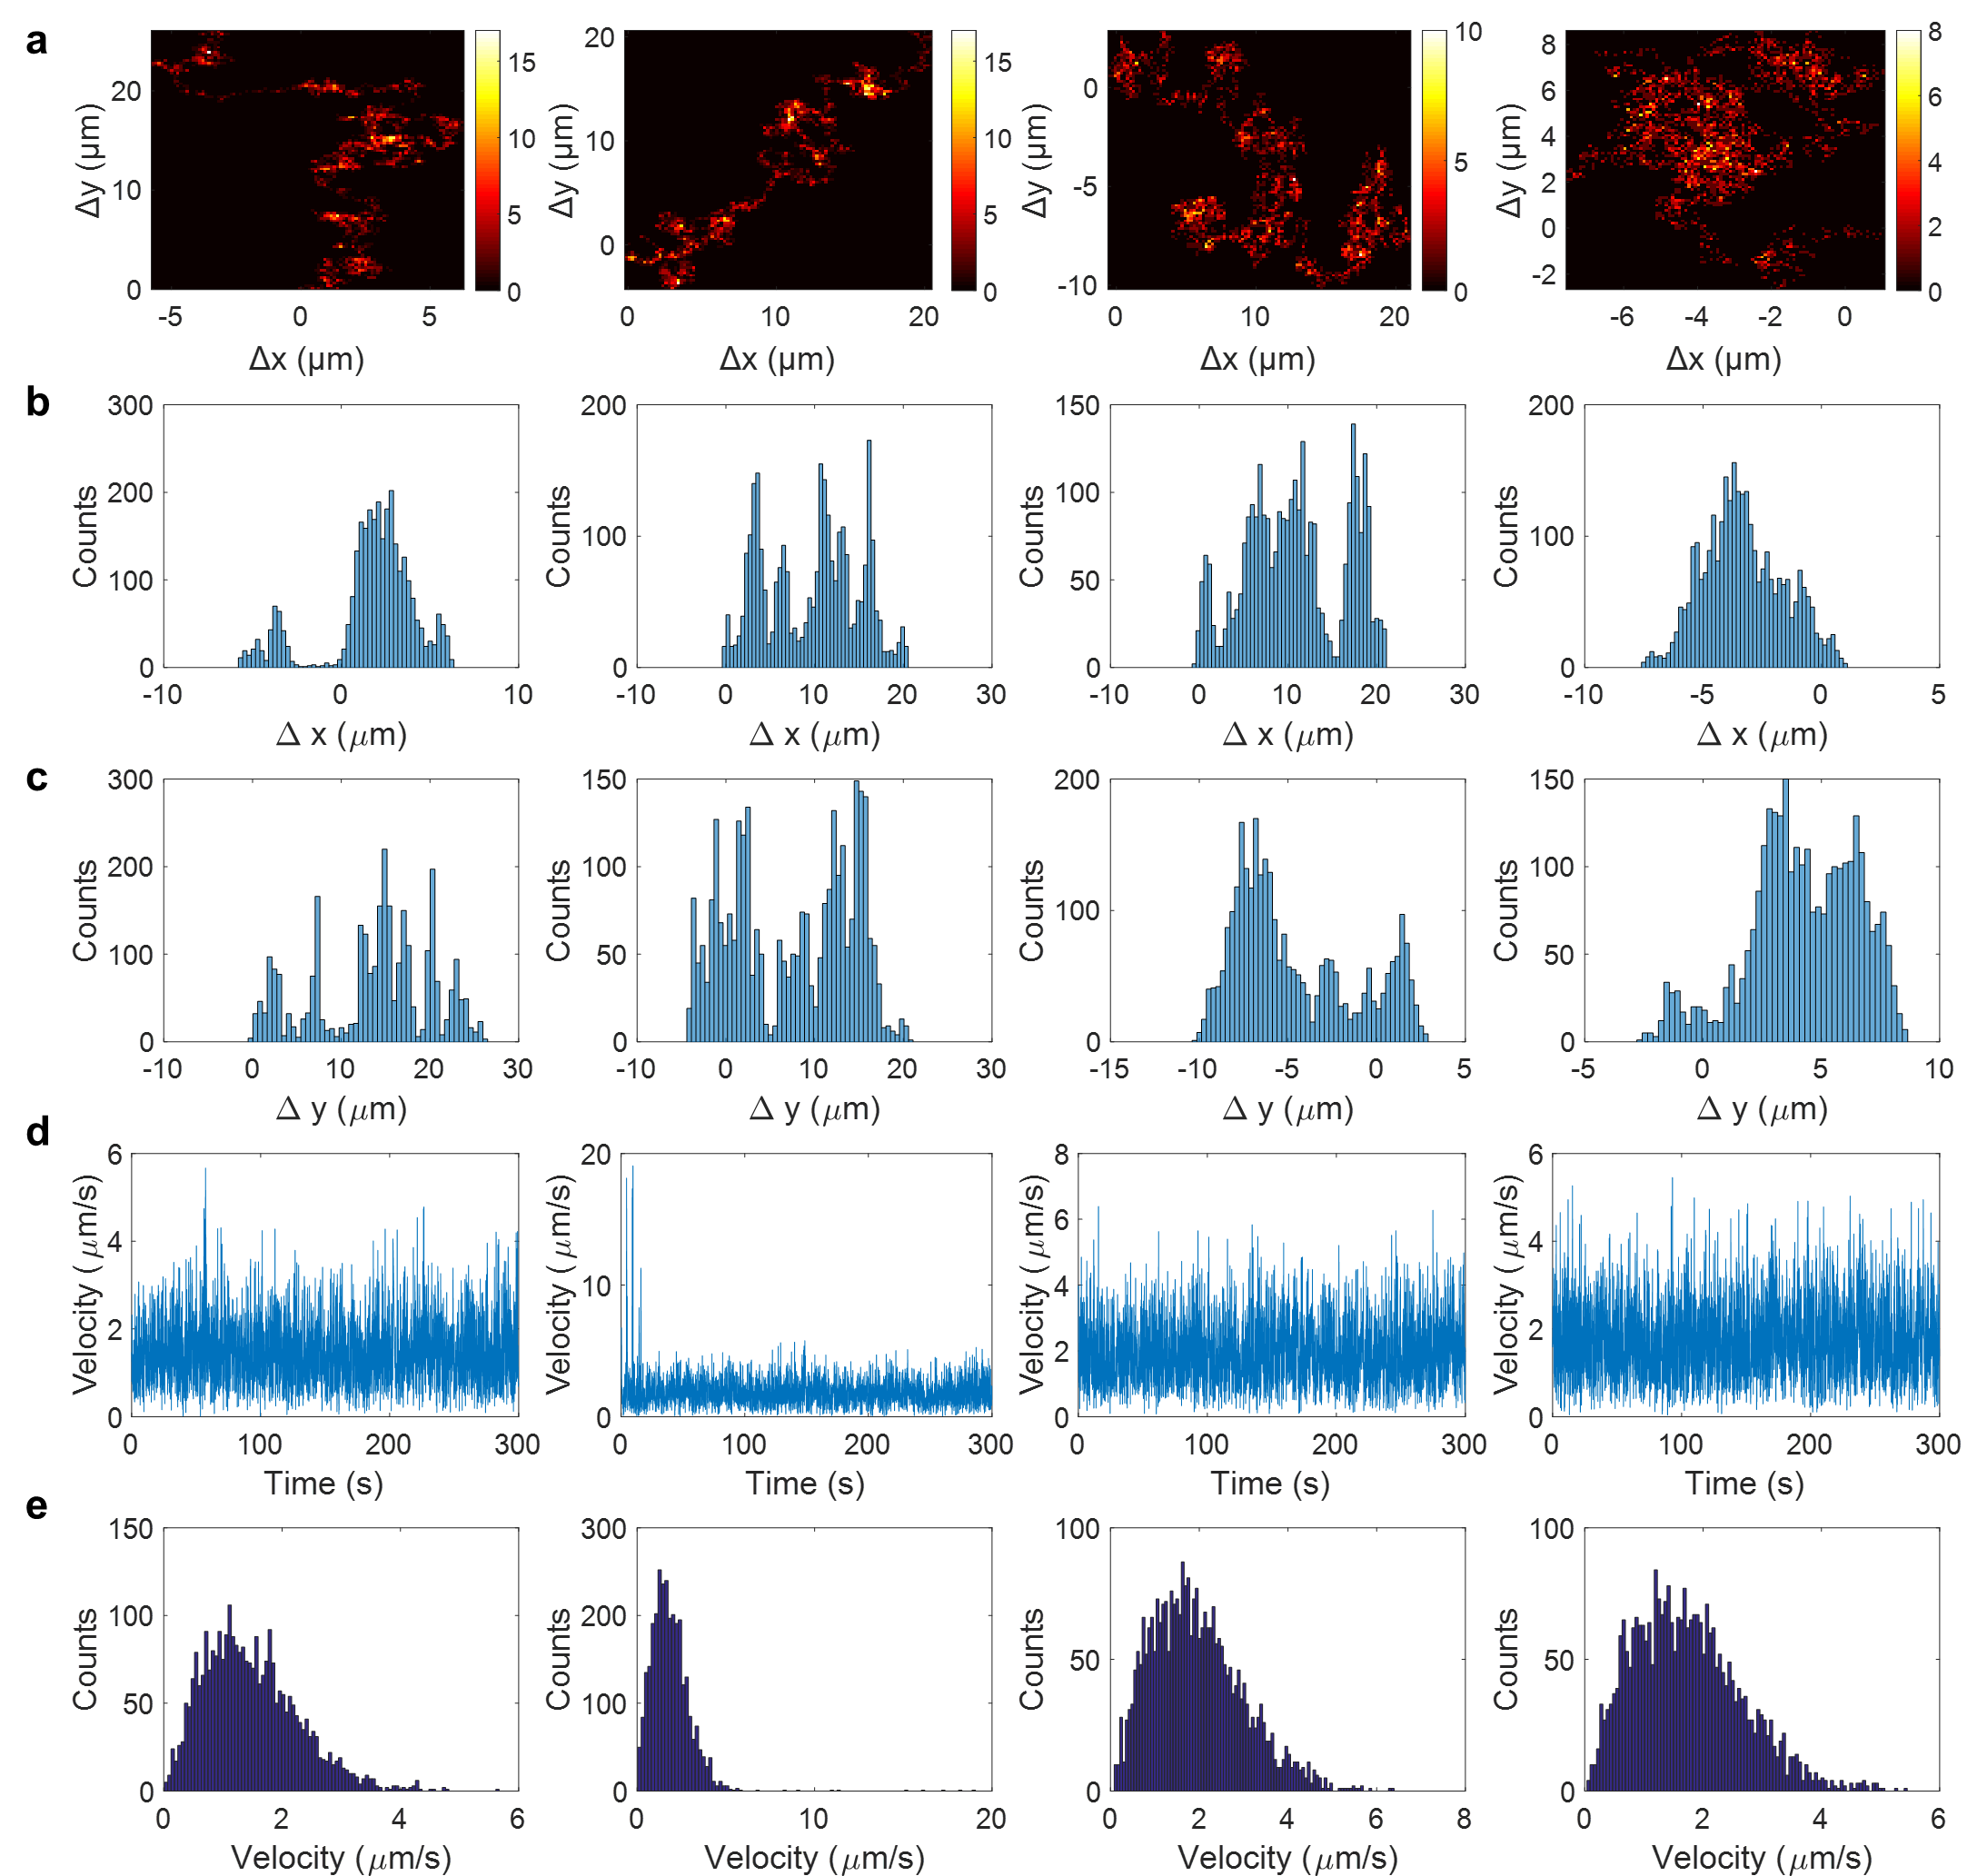


**Figure S19.** (a) Trajectory of single MnO2 particle on the glass slide surface along X and Y directions over 300 s in the presence of 0.01 mM H2O2 and CTAB solution. The corresponding probability distributions of the X displacements (b) and Y displacements (c) with single peaks. (d) The calculated time-lapsed velocity of the attached MnO2 particle from the 2D displacements. (e) The corresponding probability distribution of the velocity.

.
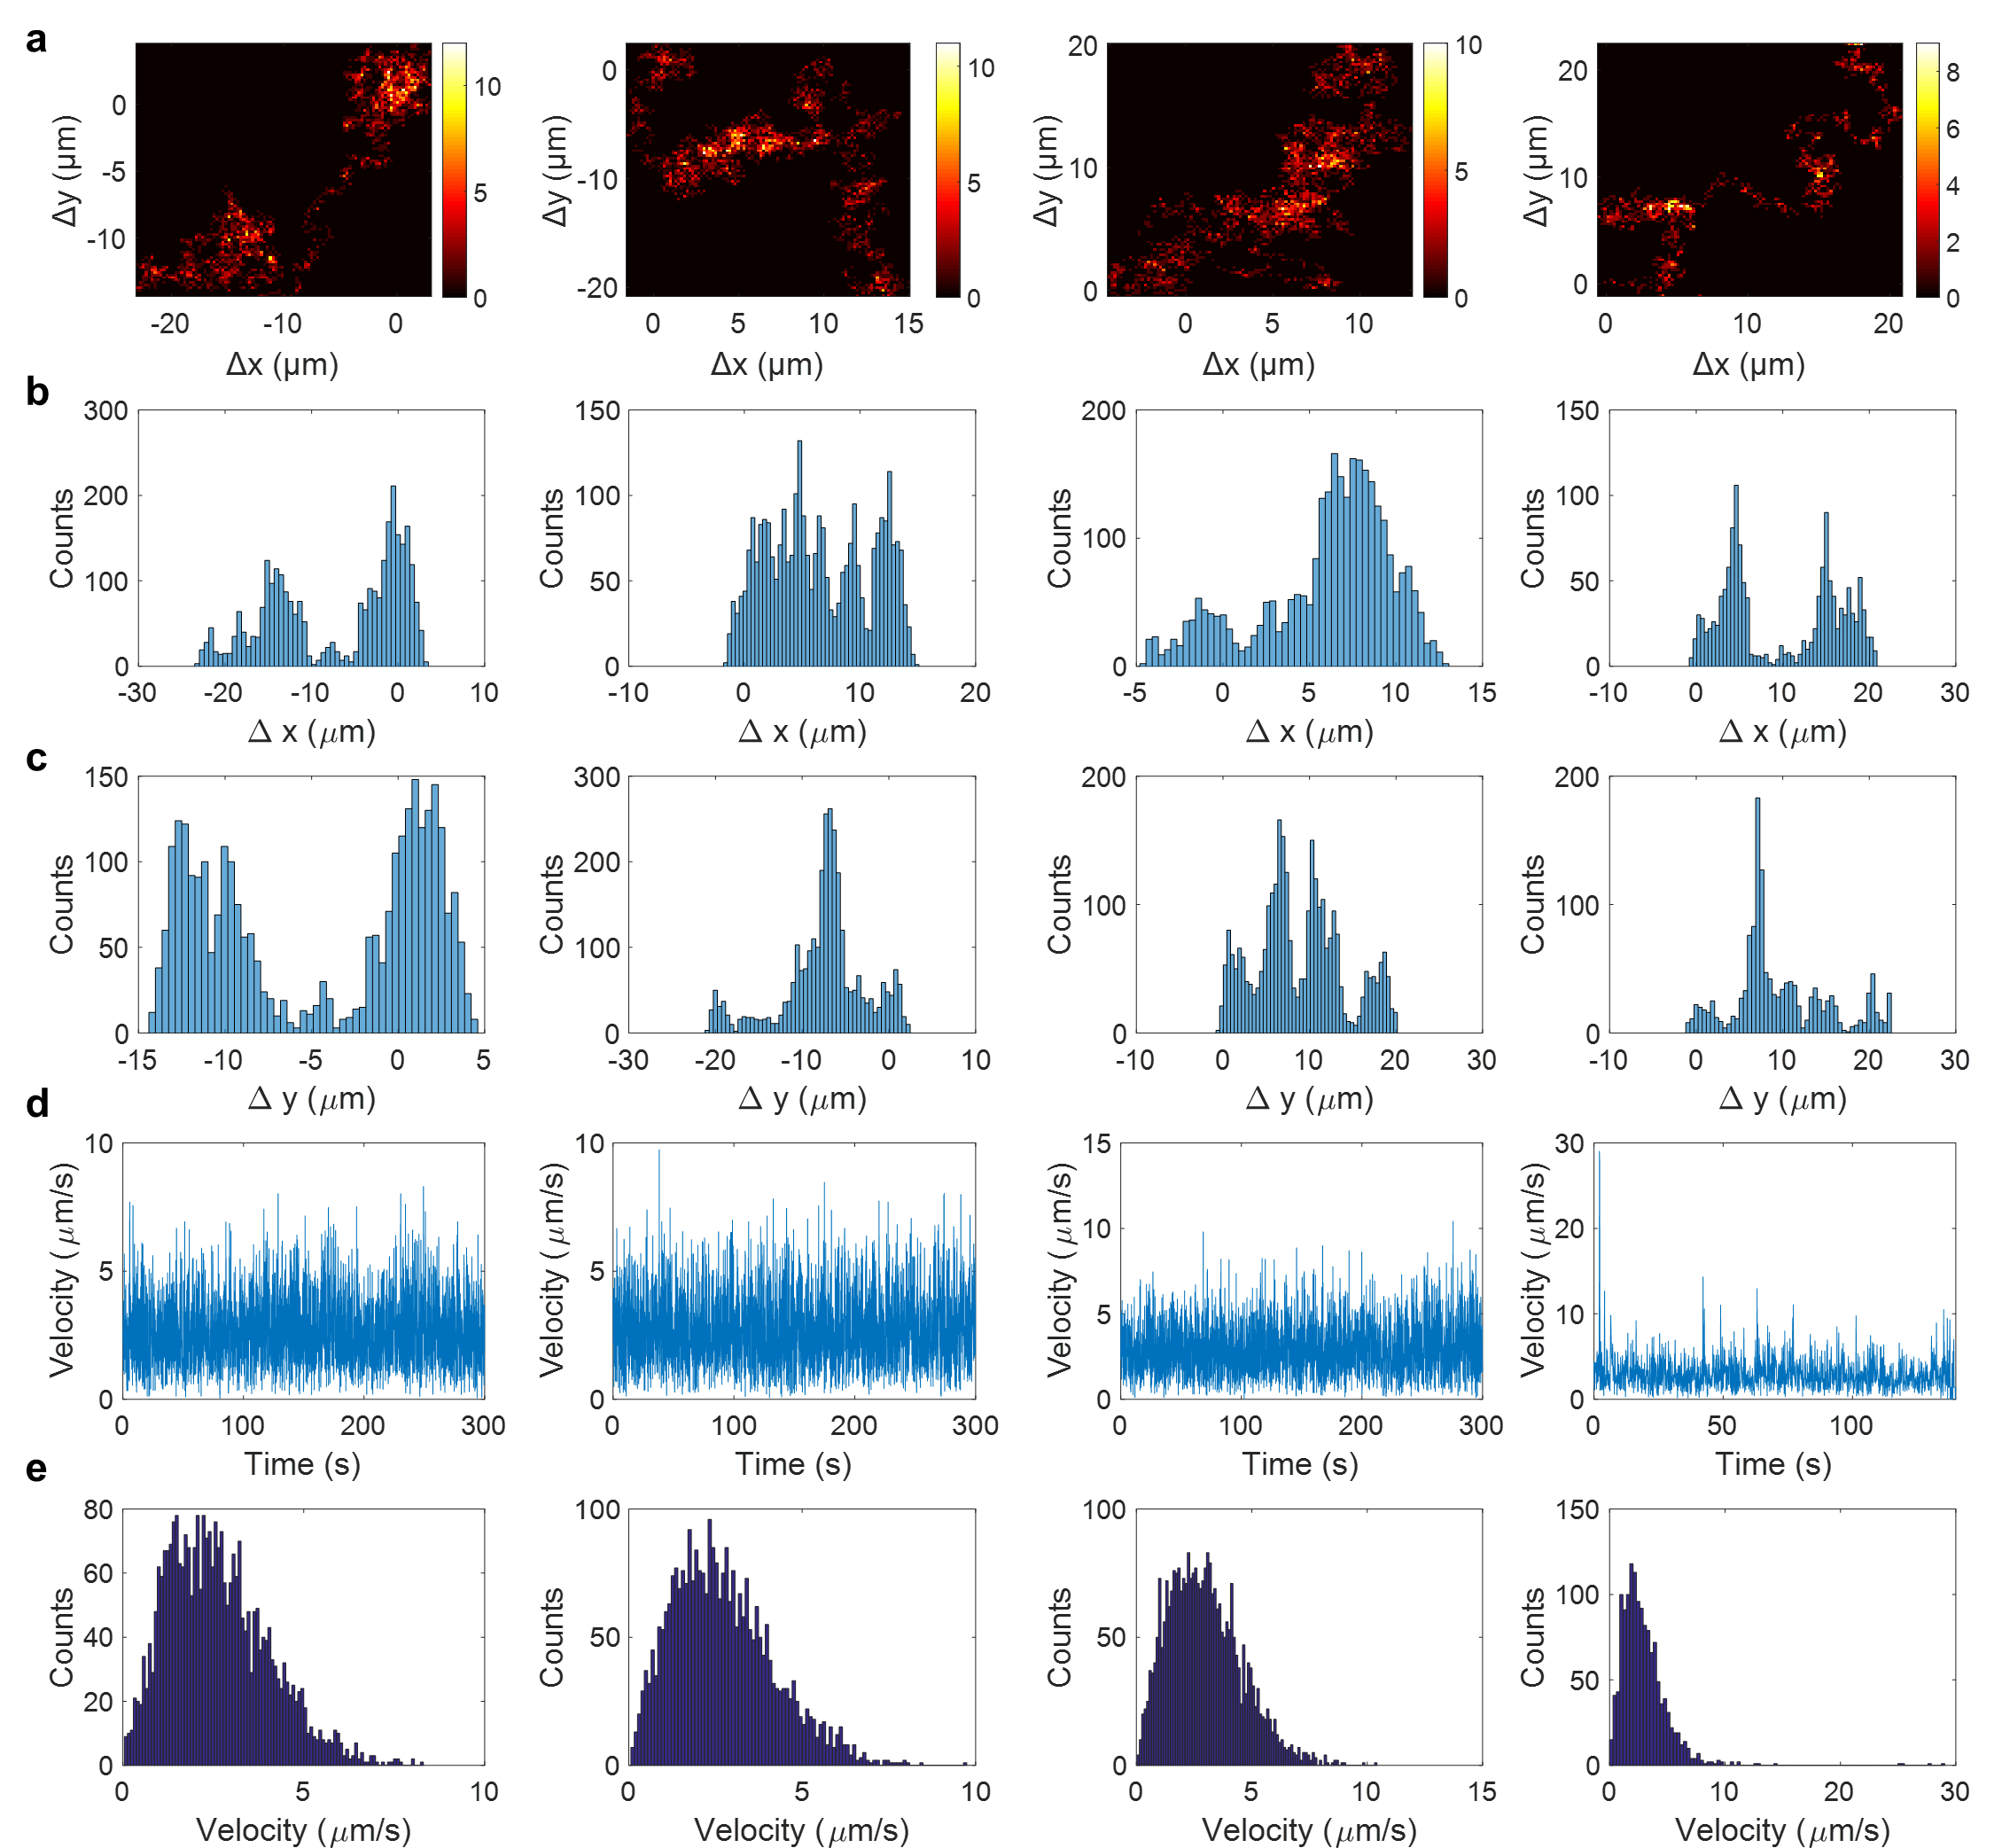


**Figure S20.** (a) Trajectory of single MnO2 particle on the glass slide surface along X and Y directions over 300 s in the presence of 0.1 mM H2O2 and CTAB solution. The corresponding probability distributions of the X displacements (b) and Y displacements (c) with single peaks. (d) The calculated time-lapsed velocity of the attached MnO2 particle from the 2D displacements. (e) The corresponding probability distribution of the velocity.

**
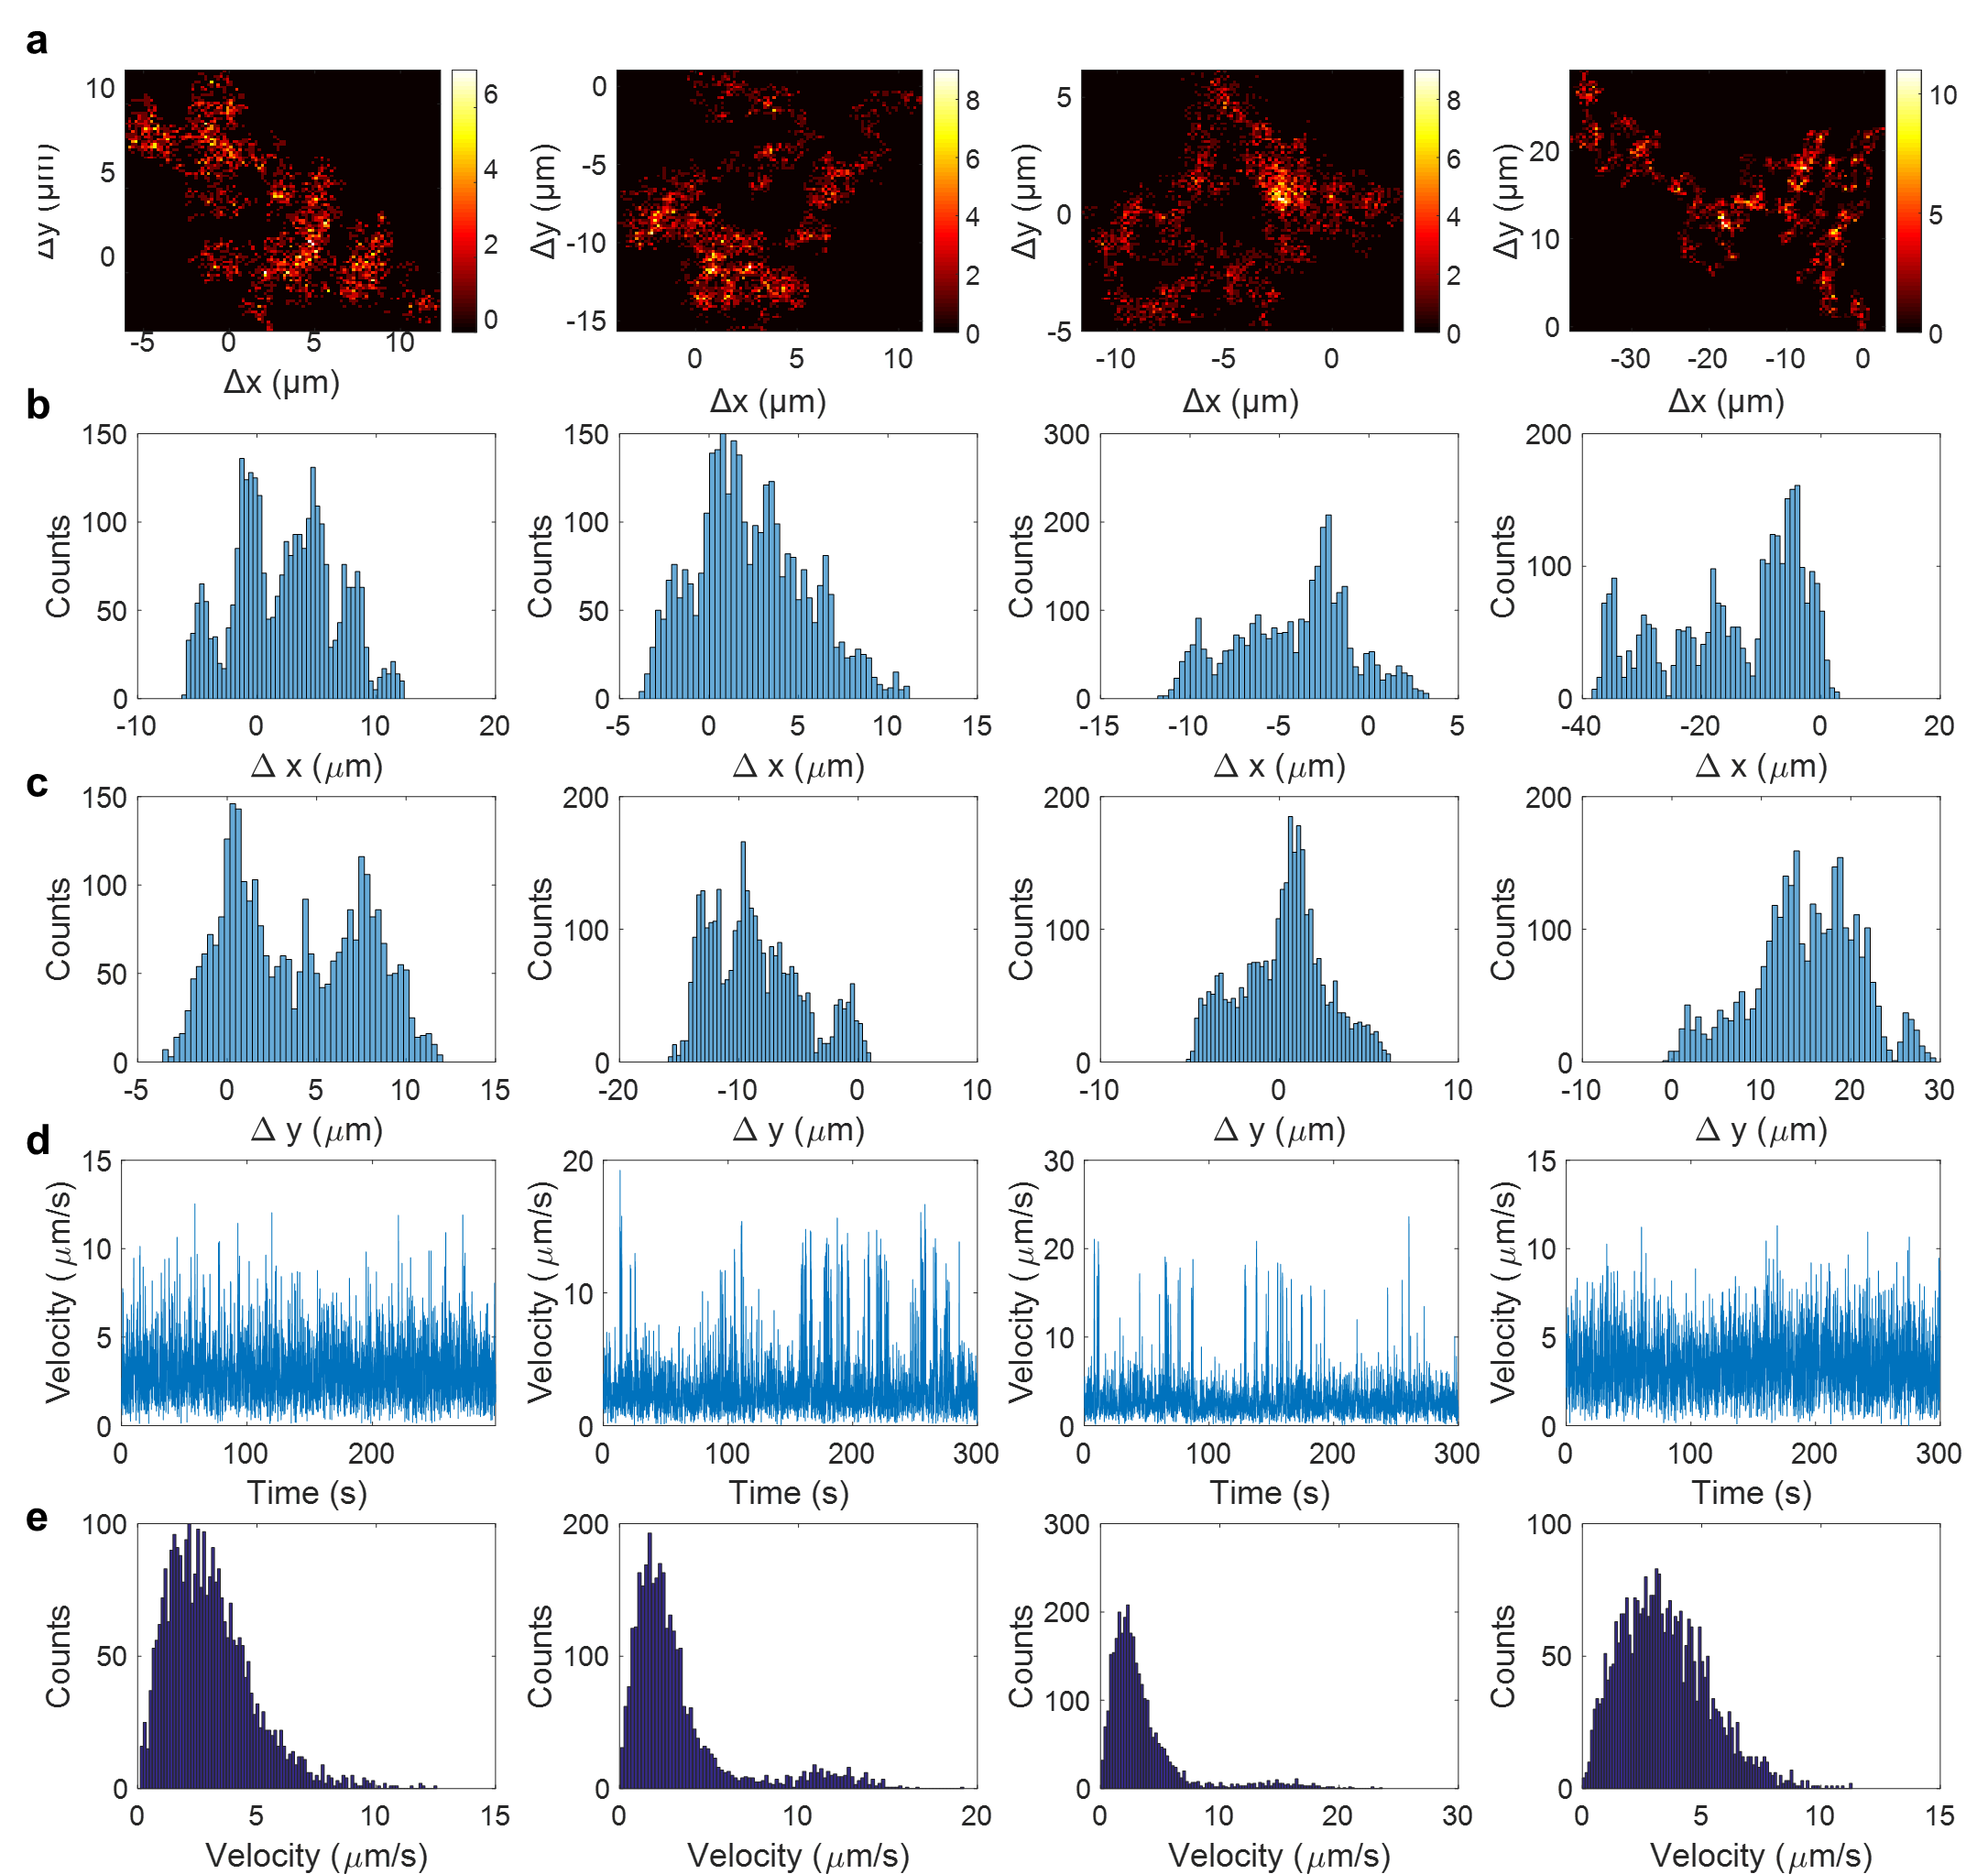
**

**Figure S21.** (a) Trajectory of single MnO2 particle on the glass slide surface along X and Y directions over 300 s in the presence of 1 mM H2O2 and CTAB solution. The corresponding probability distributions of the X displacements (b) and Y displacements (c) with single peaks. (d) The calculated time-lapsed velocity of the attached MnO2 particle from the 2D displacements. (e) The corresponding probability distribution of the velocity.

**
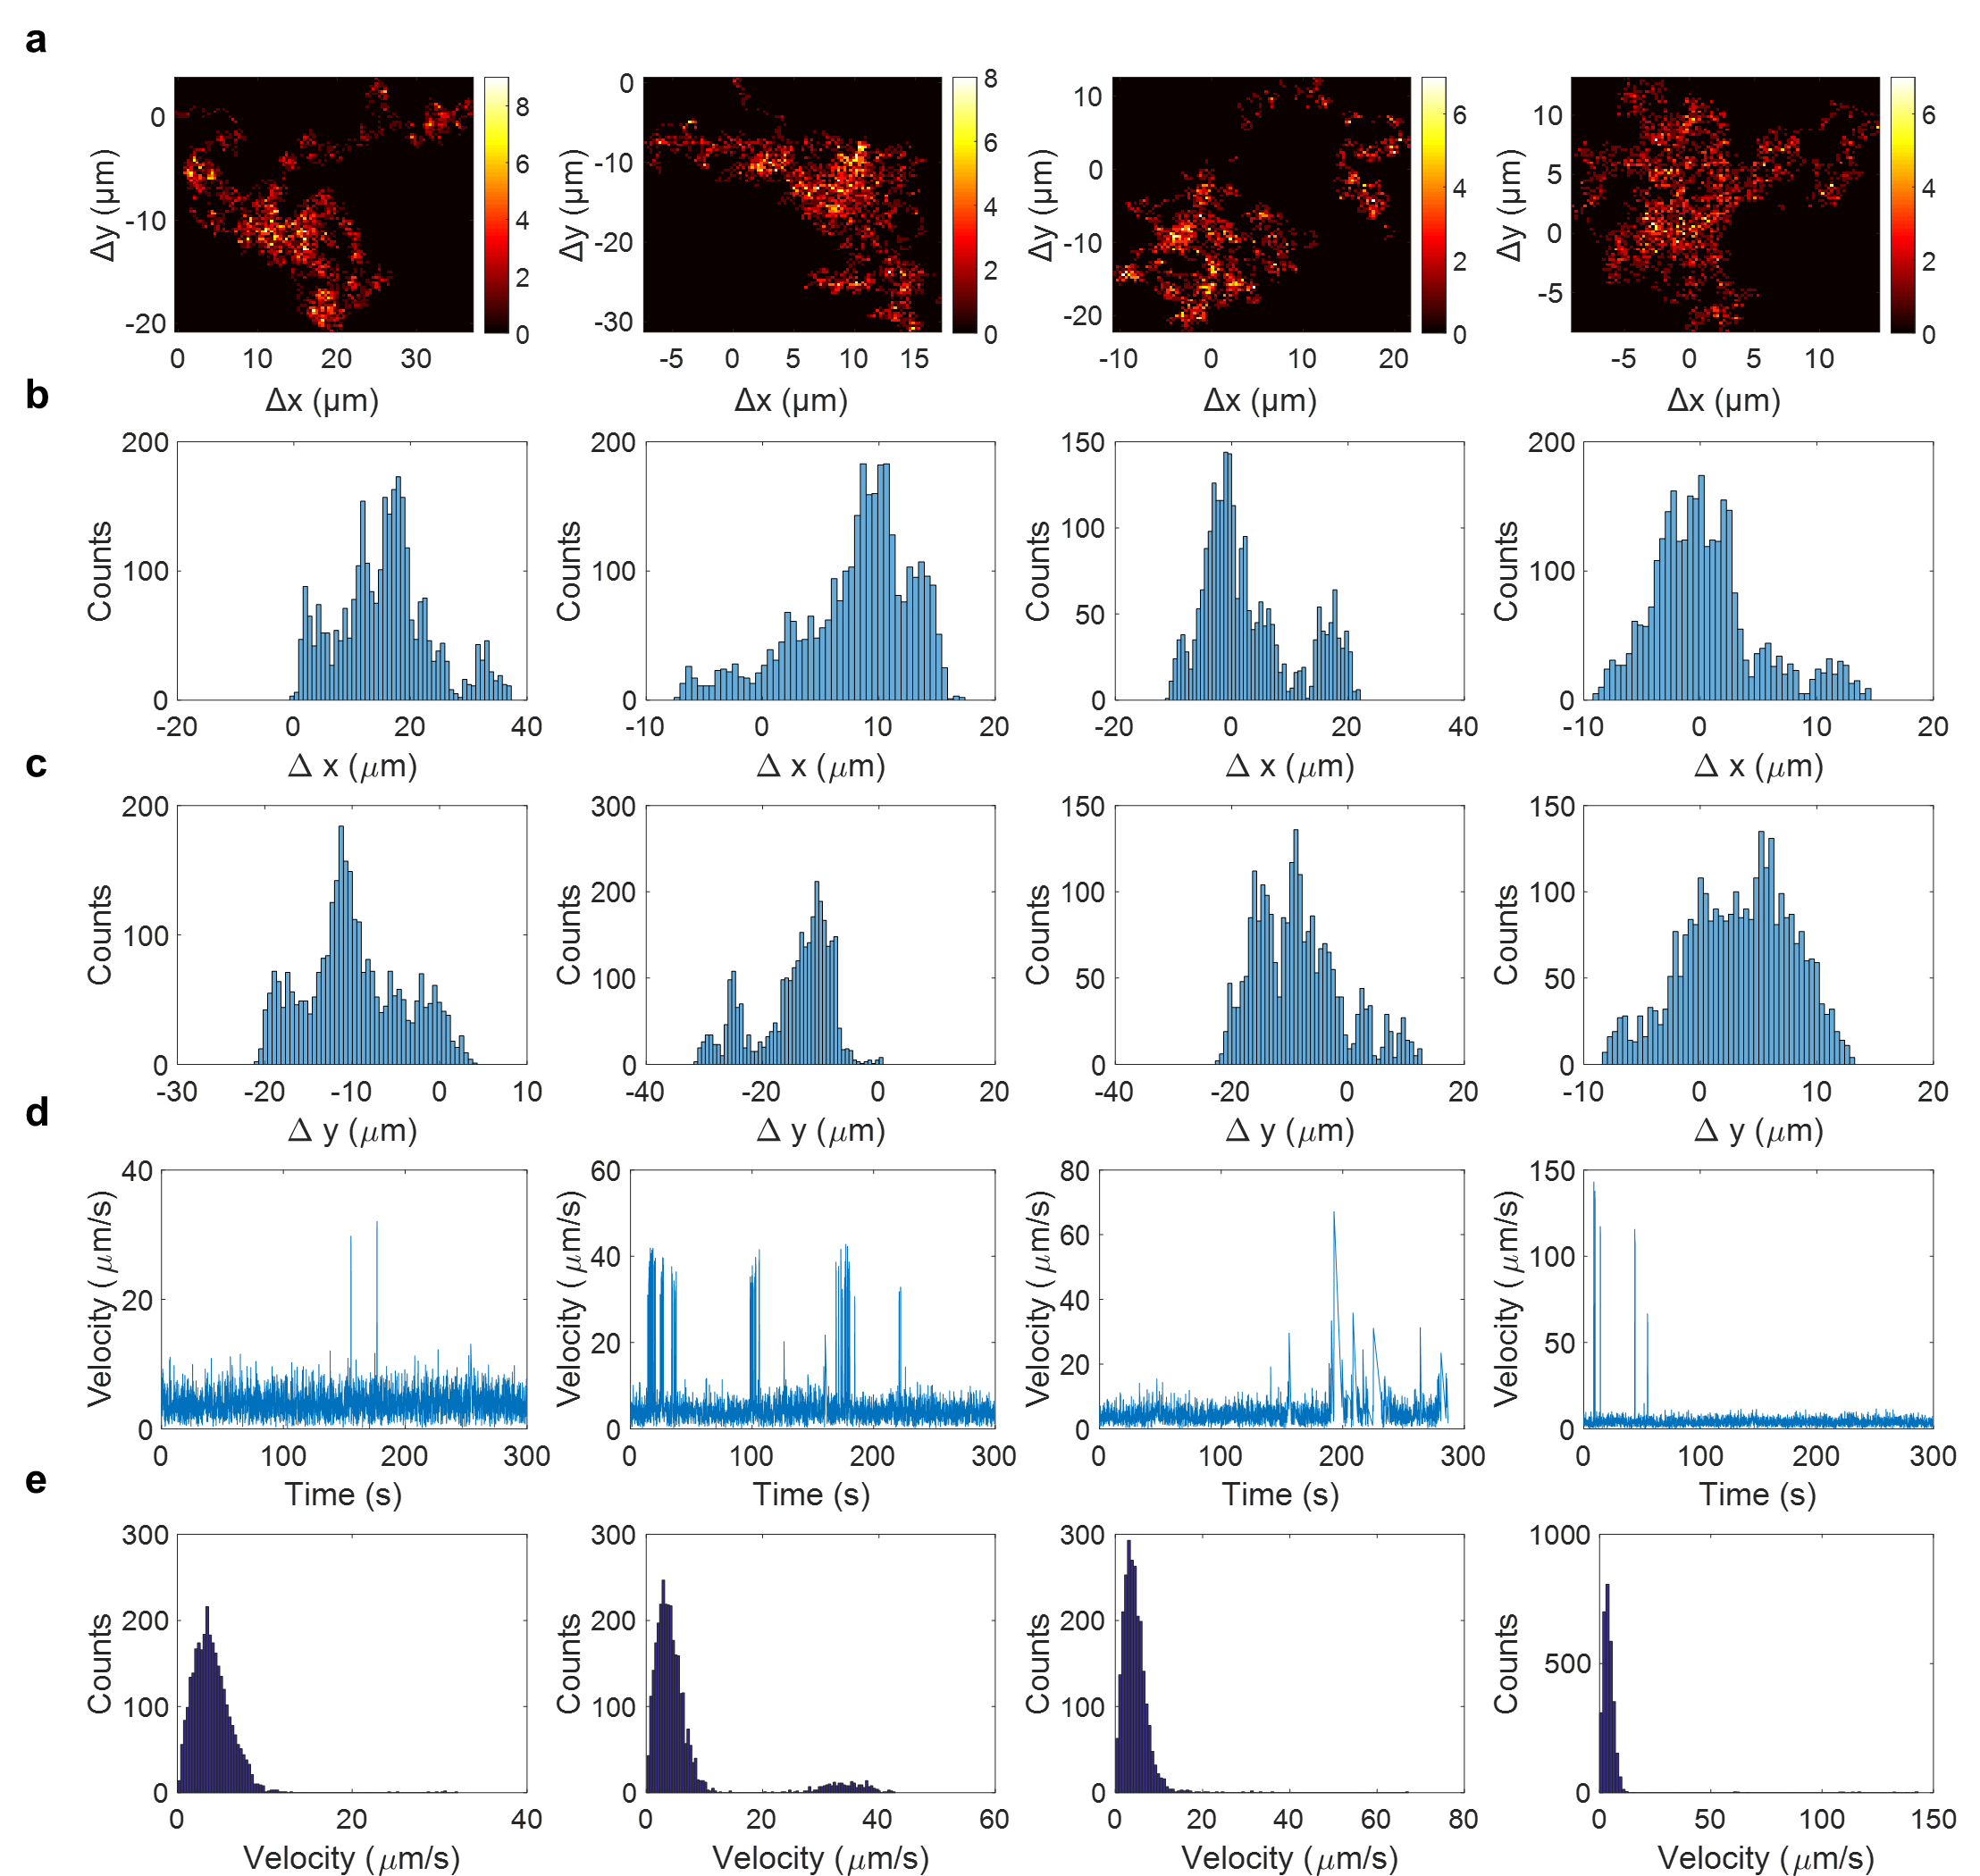
**

**Figure S22.** (a) Trajectory of single MnO2 particle on the glass slide surface along X and Y directions over 300 s in the presence of 10 mM H2O2 and CTAB solution. The corresponding probability distributions of the X displacements (b) and Y displacements (c) with single peaks. (d) The calculated time-lapsed velocity of the attached MnO2 particle from the 2D displacements. (e) The corresponding probability distribution of the velocity.


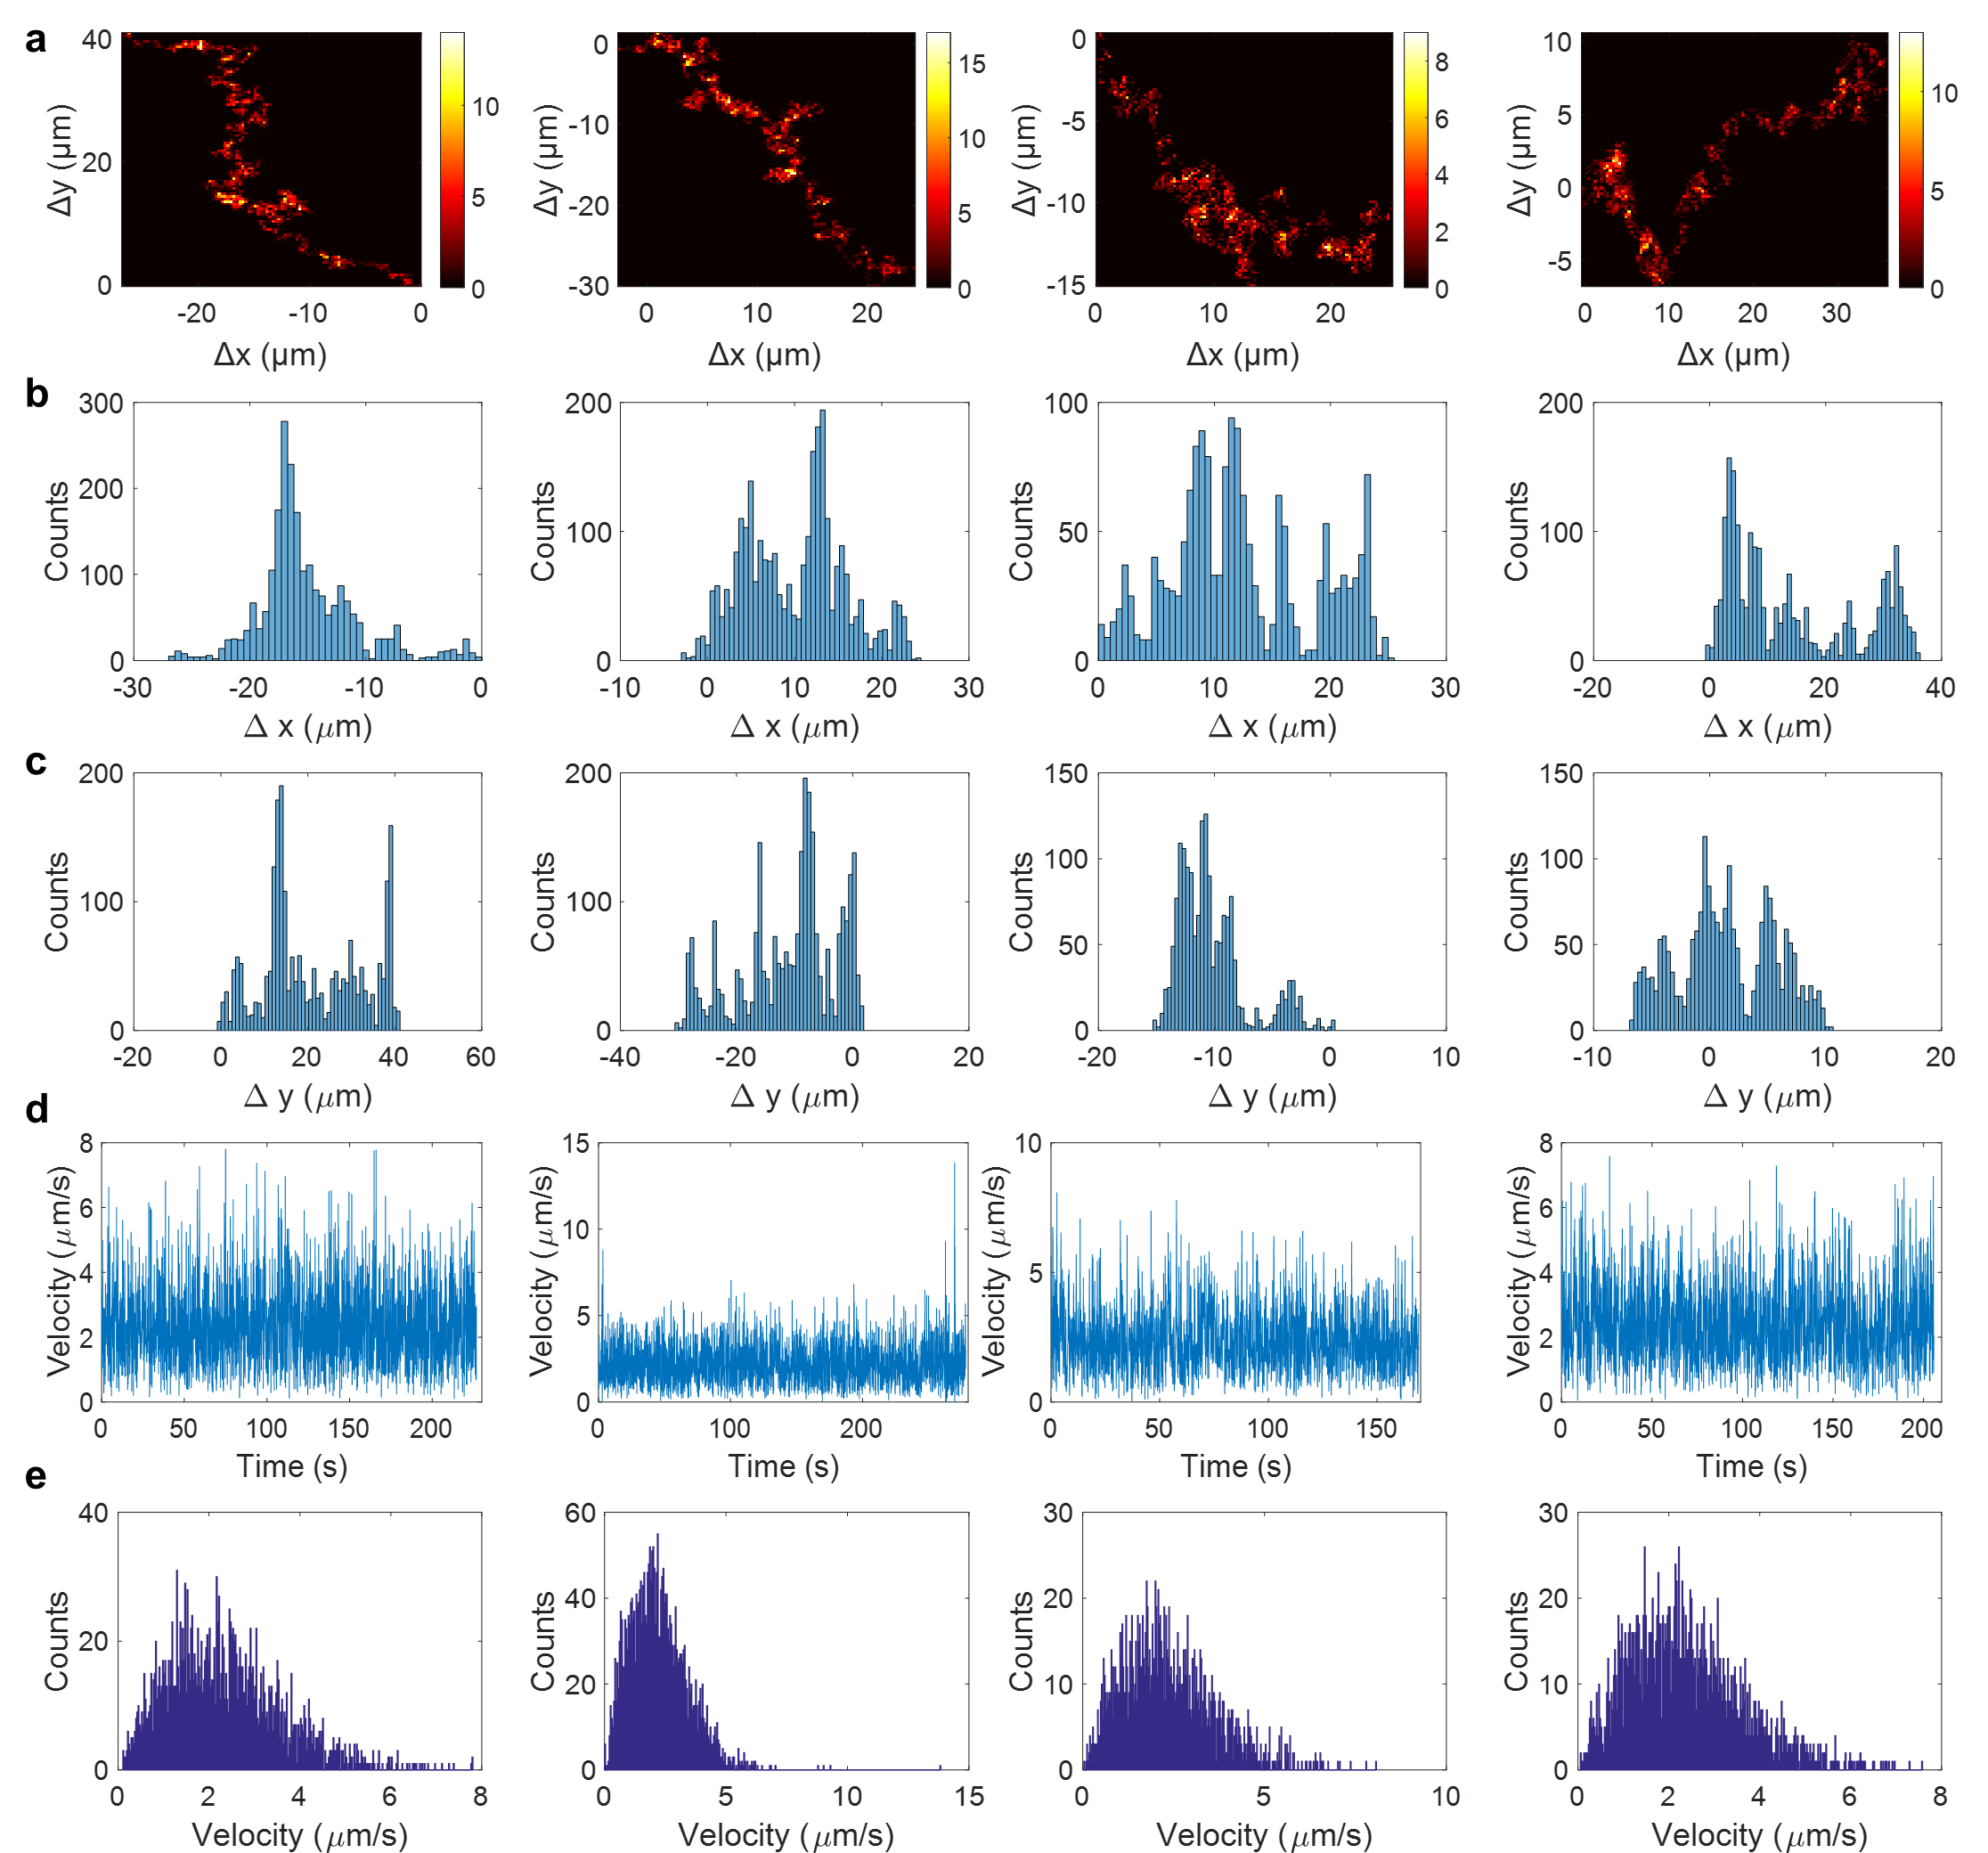


**Figure S23.** (a) Trajectory of single MnO2 particle on the glass slide surface along X and Y directions over 300 s in the presence of 0.01 mM H2O2 and Tween-20 solution. The corresponding probability distributions of the X displacements (b) and Y displacements (c) with single peaks. (d) The calculated time-lapsed velocity of the attached MnO2 particle from the 2D displacements. (e) The corresponding probability distribution of the velocity.


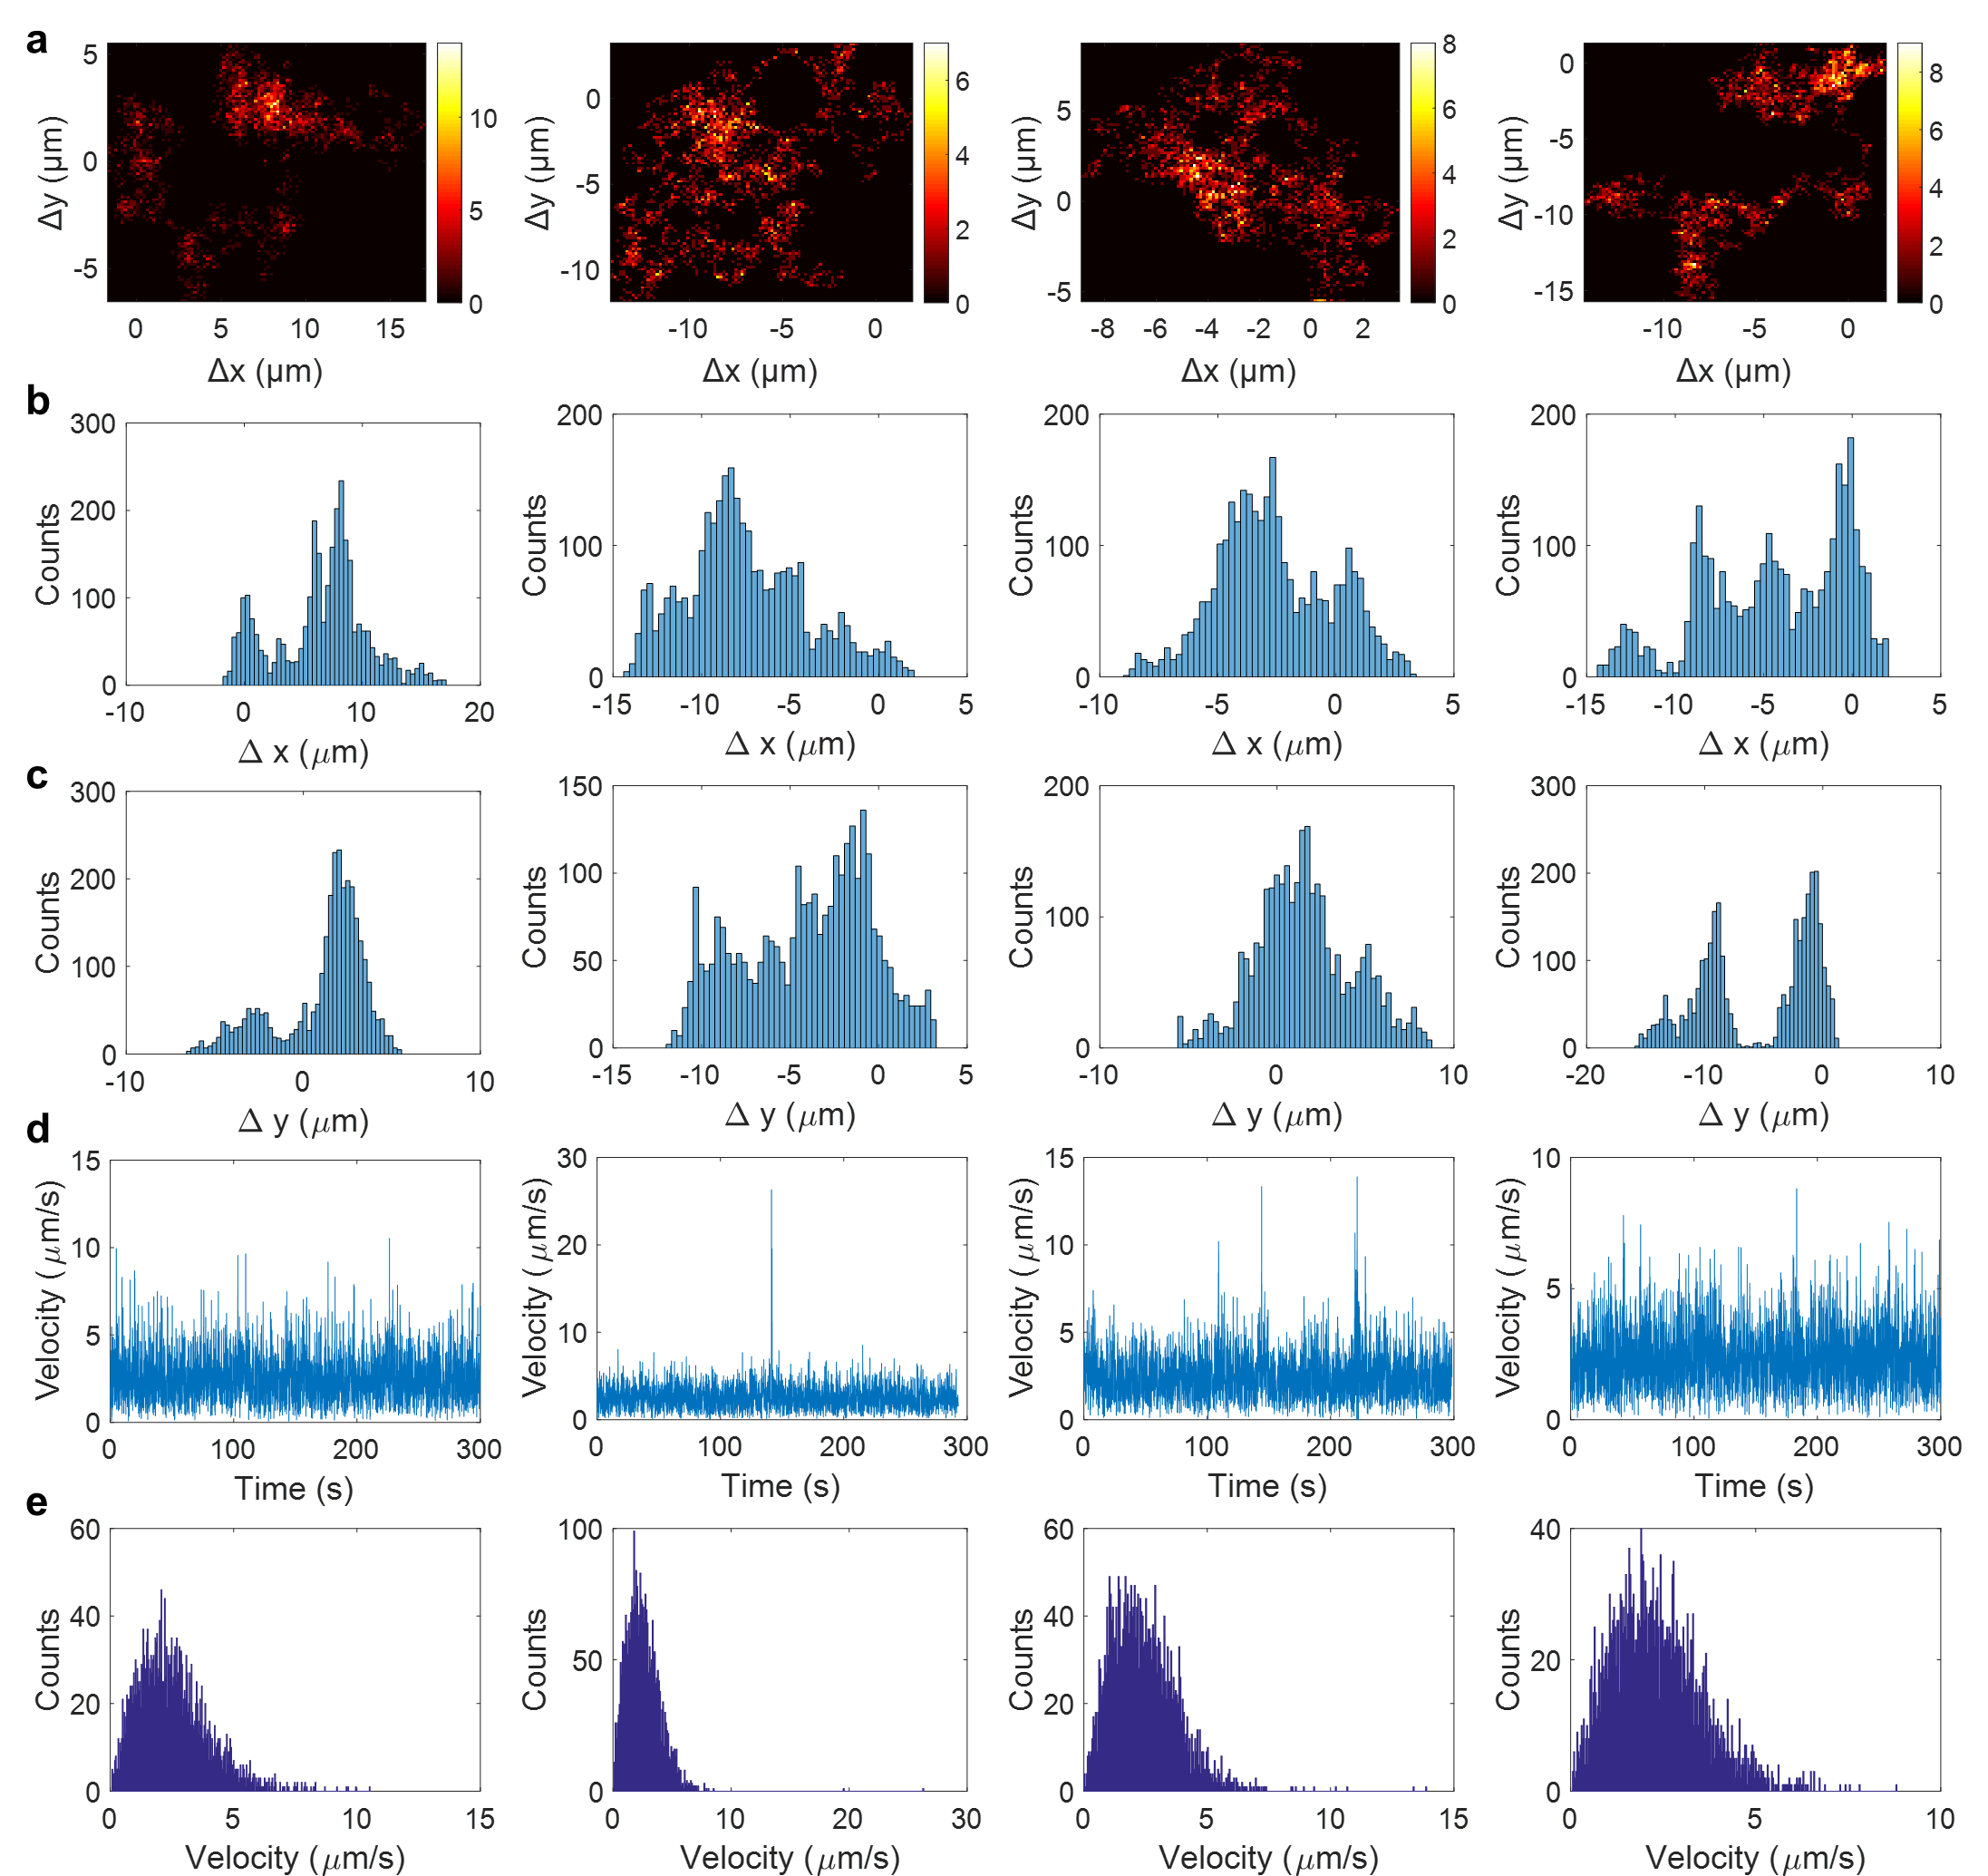


**Figure S24.** (a) Trajectory of single MnO2 particle on the glass slide surface along X and Y directions over 300 s in the presence of 0.1 mM H2O2 and Tween-20 solution. The corresponding probability distributions of the X displacements (b) and Y displacements (c) with single peaks. (d) The calculated time-lapsed velocity of the attached MnO2 particle from the 2D displacements. (e) The corresponding probability distribution of the velocity.


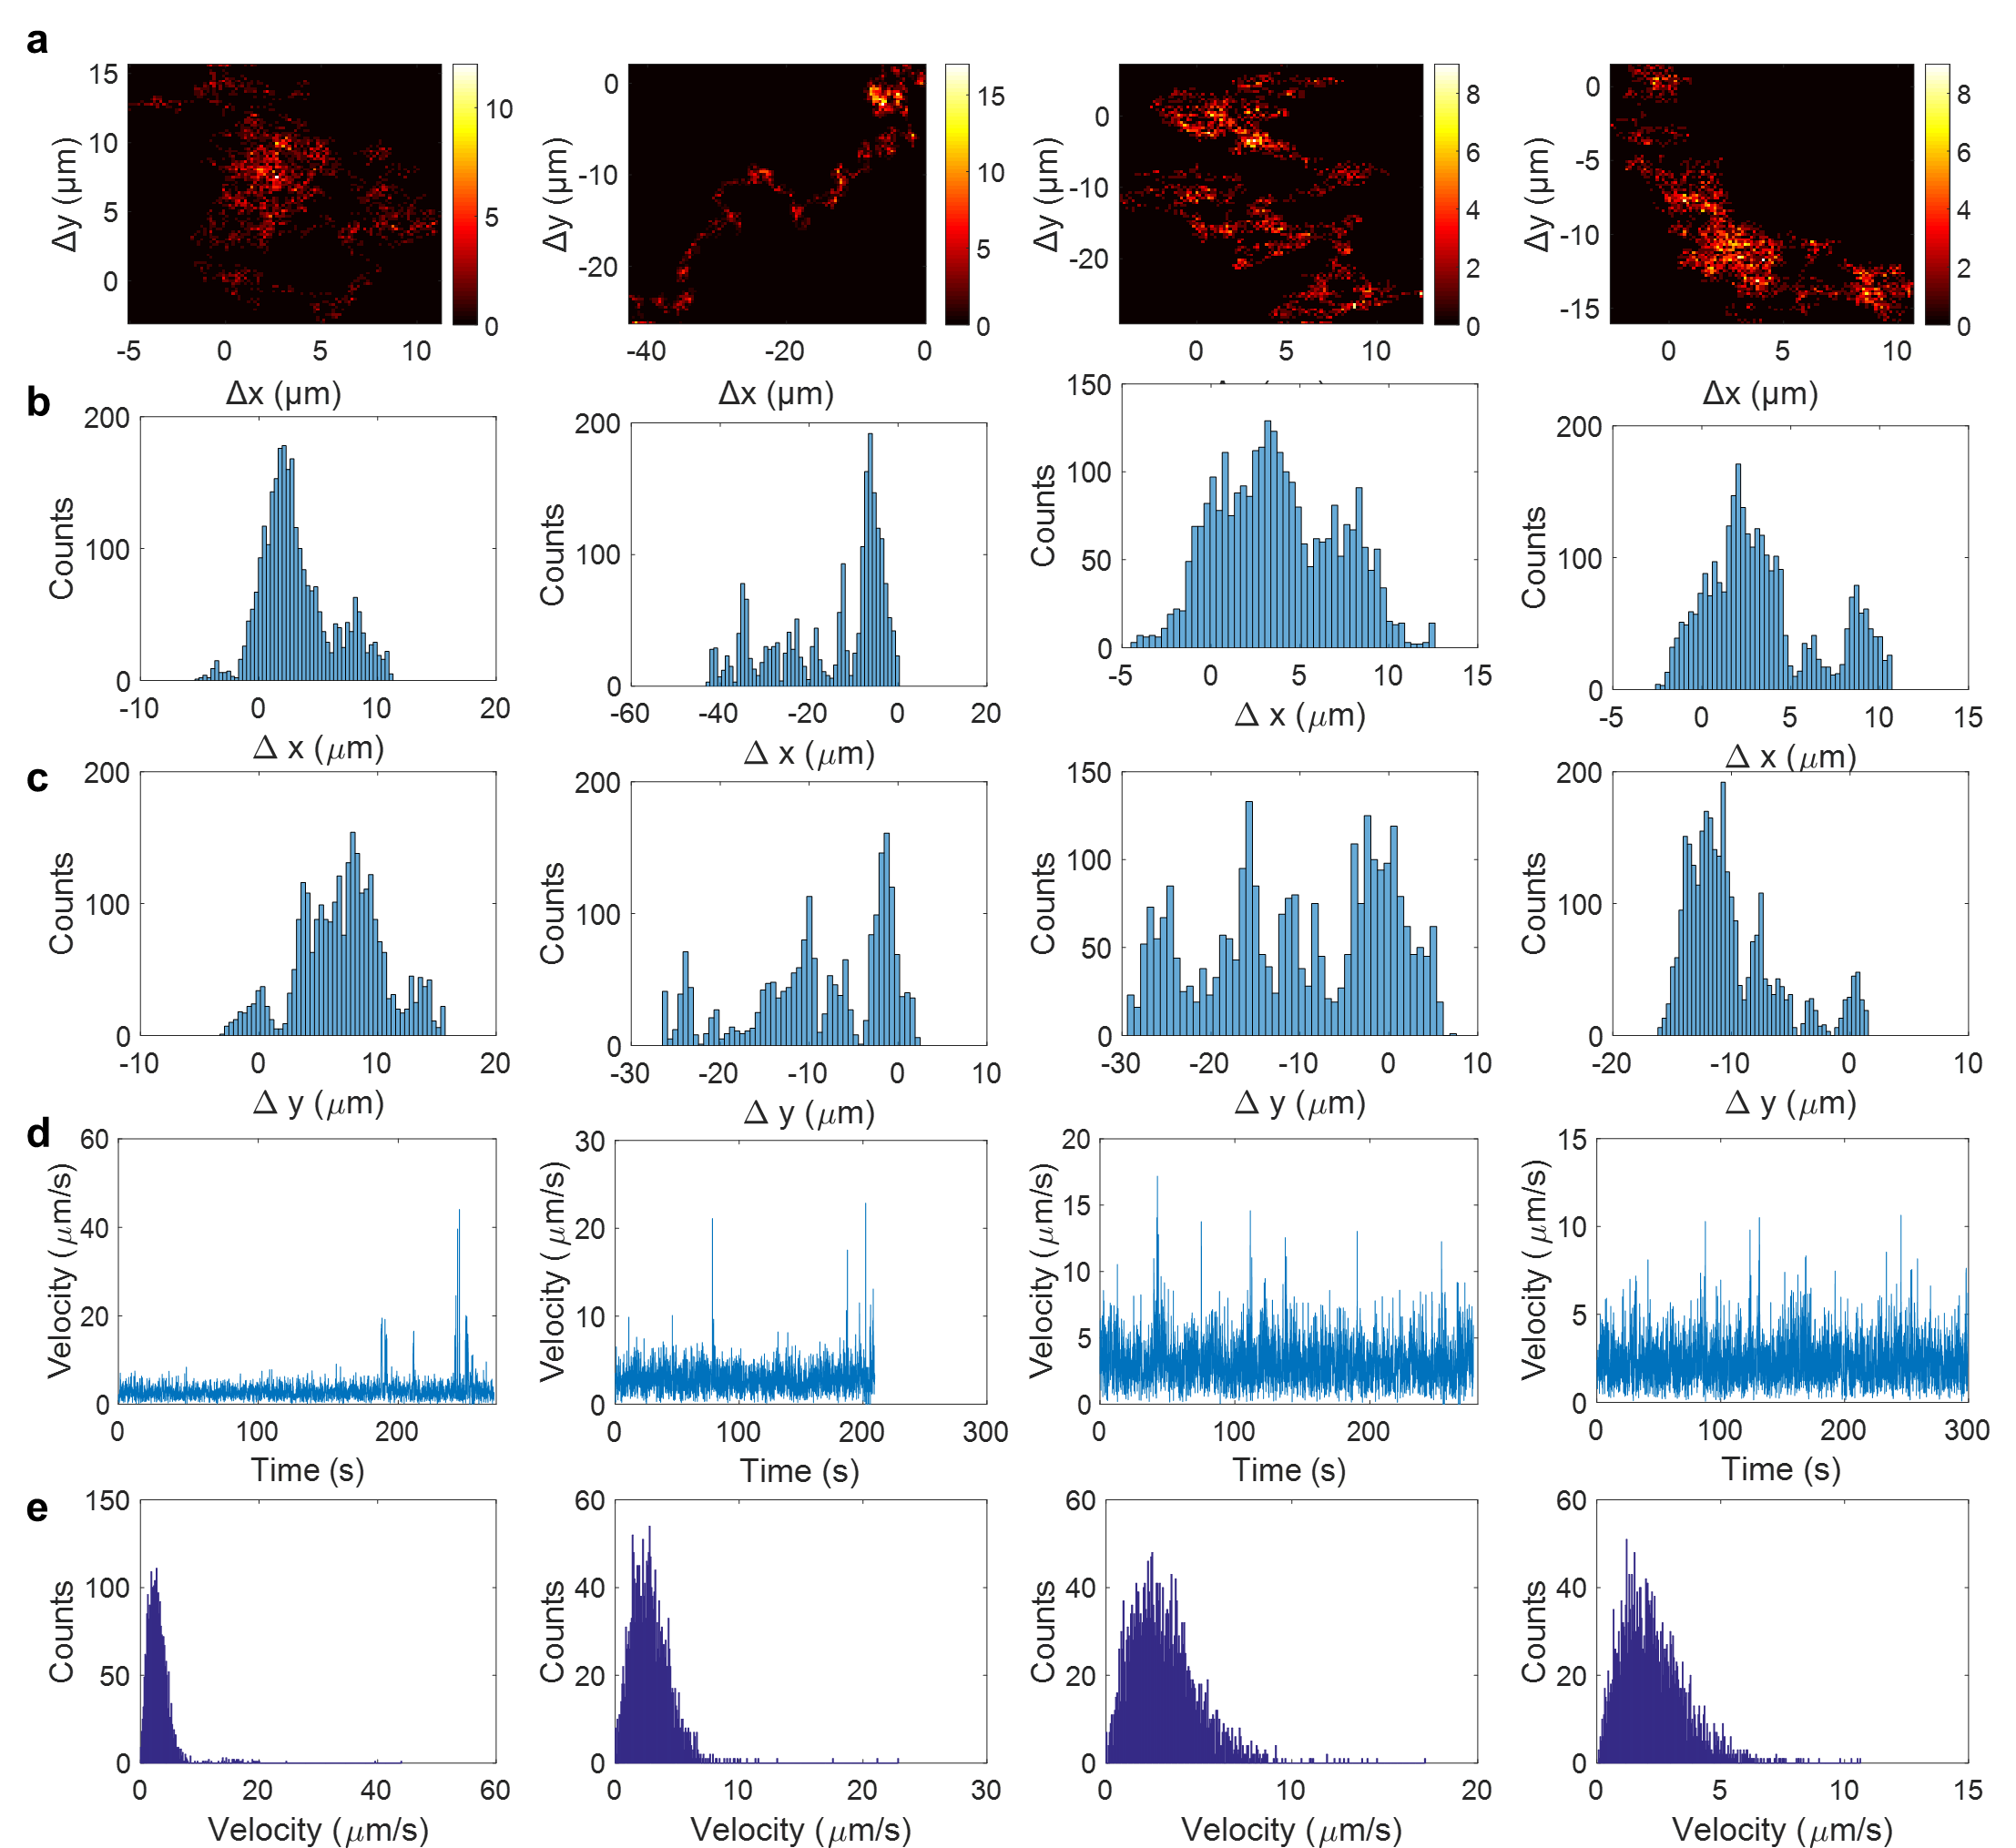


**Figure S25.** (a) Trajectory of single MnO2 particle on the glass slide surface along X and Y directions over 300 s in the presence of 1 mM H2O2 and Tween-20 solution. The corresponding probability distributions of the X displacements (b) and Y displacements (c) with single peaks. (d) The calculated time-lapsed velocity of the attached MnO2 particle from the 2D displacements. (e) The corresponding probability distribution of the velocity.


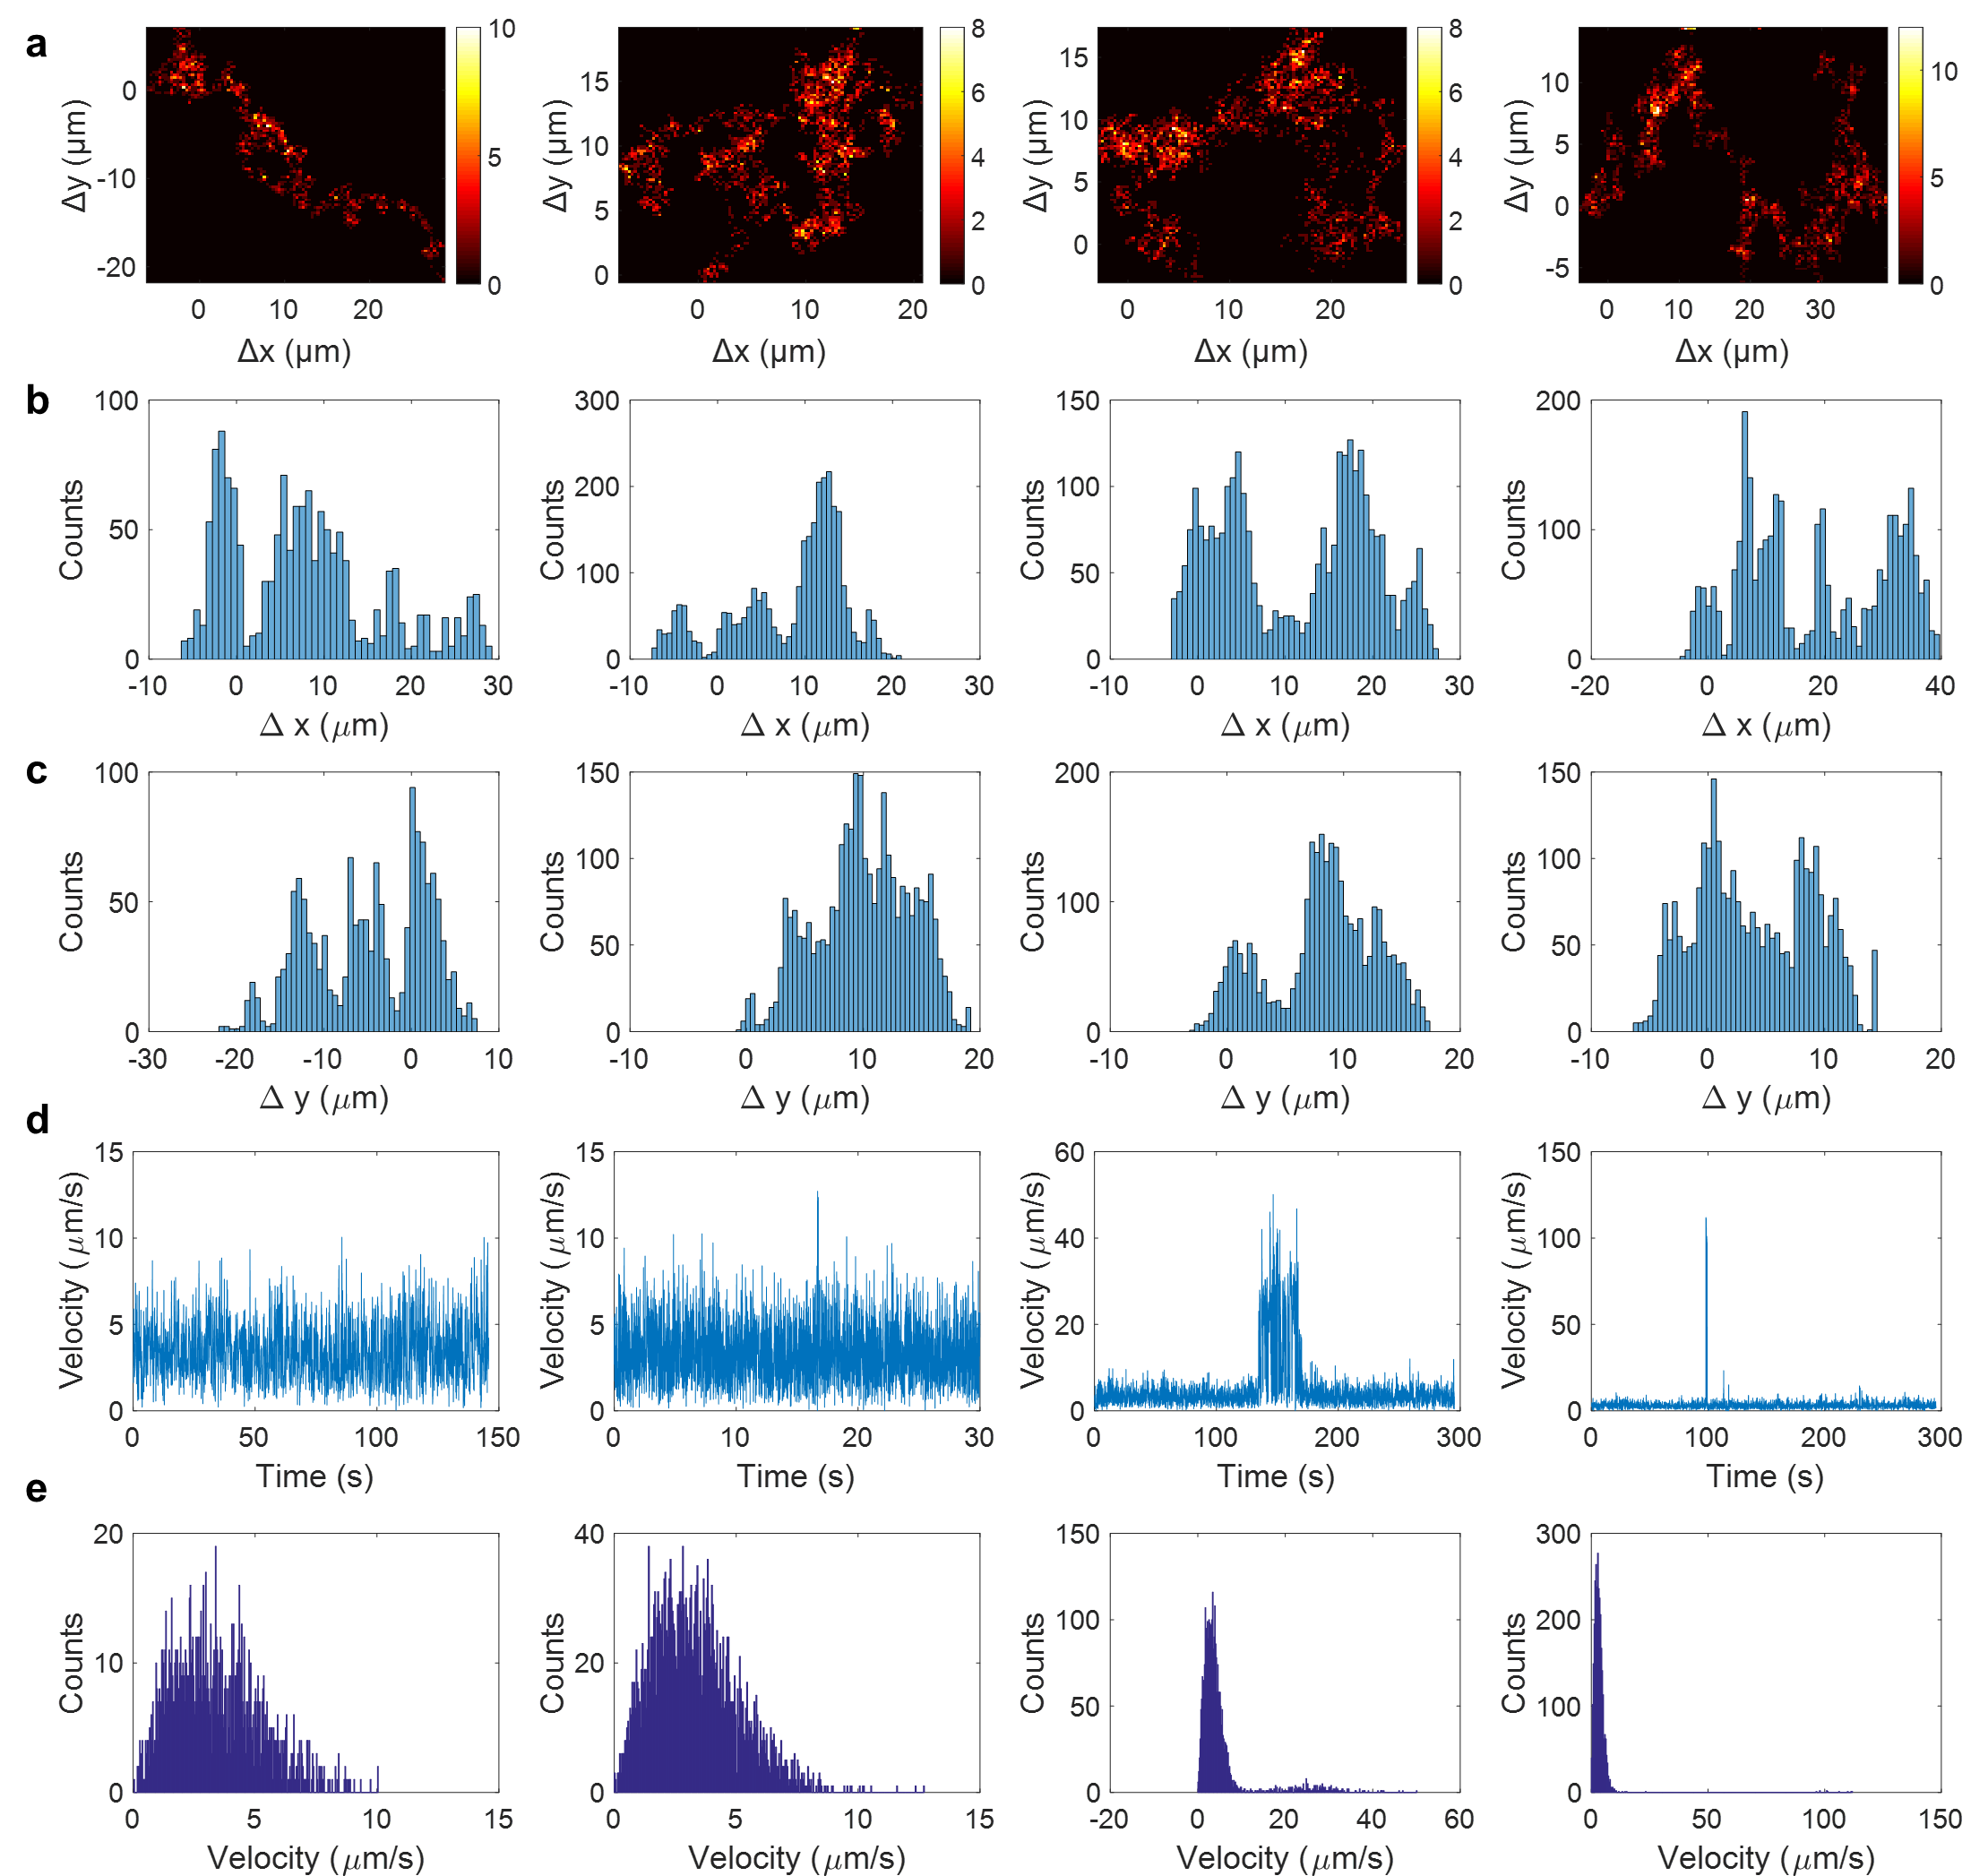


**Figure S26.** (a) Trajectory of single MnO2 particle on the glass slide surface along X and Y directions over 300 s in the presence of 10 mM H2O2 and Tween-20 solution. The corresponding probability distributions of the X displacements (b) and Y displacements (c) with single peaks. (d) The calculated time-lapsed velocity of the attached MnO2 particle from the 2D displacements. (e) The corresponding probability distribution of the velocity.

**S9. Measurement of catalytic reaction in ensemble reaction**


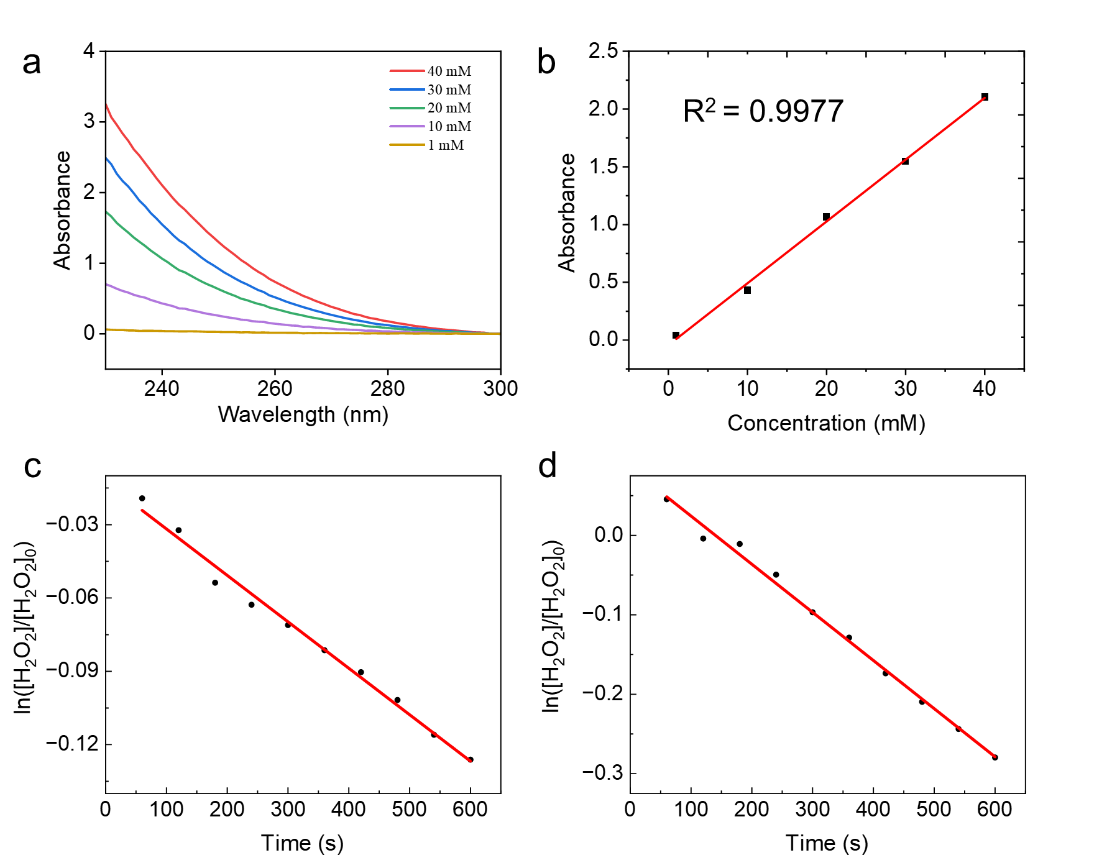


**Figure S27.** The rate of H2O2 decomposition at MnO2 nanoparticles. (a) The absorbance spectra of H2O2 at various concentrations. (b) The calibration curve for H2O2 concentration and absorbance. Decomposition of 10 mM H2O2 catalyzed by MnO2 in the presence of (c) SDS and (d) CTAB.

The concentration of H2O2 in the solution was determined by the spectrophotometric method based on Beer-Lambert law in previous work:

(S1)

Where A is the measured absorbance, is the molar extinction coefficient ( = 43.6 at 240 nm), L is the pass length and C is the concentration of H2O2. For quantitative analysis, H2O2 was diluted to 1-40 mM using ultrapure water to achieve measurable absorbance levels. A characteristic broad peak at 240 nm was observed in the corresponding UV-Vis spectra (Figure S27a). The high linearity of the resulting calibration curve (R2 = 0.9977) indicates that the absorbance at this wavelength can be effectively used to quantify H2O2 concentration (Figure S27b).

As is shown in Figure S27c-d, is linearly related to decomposition time over 600 s, indicating the decompositions of H2O2 at 0.01 mM of MnO2 nanoparticles in the presence of SDS and CTAB were fitted well based on the first-order kinetics. The reaction rate is faster in the CTAB than in the SDS, which is consistent with the results of single nanoparticles.

**S10. Statistical analysis of high-velocity duration times**


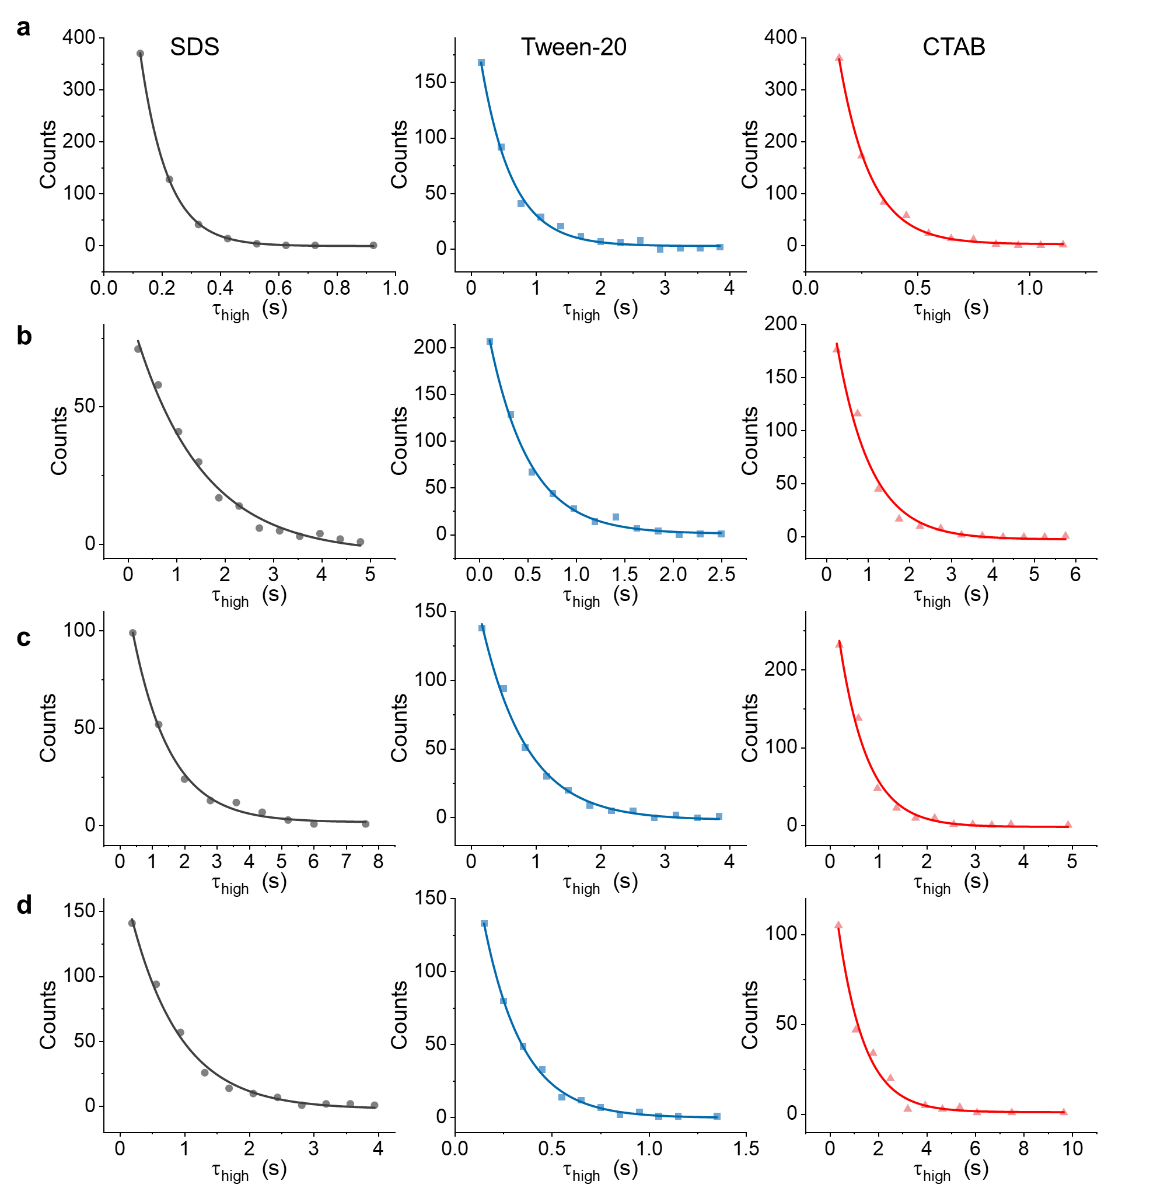


**Figure S28.** The distribution of high-velocity duration times fit with an exponential decay function of individual MnO2 nanoparticles at different concentrations of H2O2 of (a) 0.01 mM, (b) 0.1 mM, (c) 1 mM and (d) 10 mM in the presence of SDS, Tween-20 and CTSB.

The velocities of individual MnO2 nanoparticles in the absence of H2O2 indicate the background noise level. The threshold is set to 10 times the standard deviation of the background noise to distinguish the high state in the velocity trajectory. The distribution of high-velocity duration can be expressed as

where represents the frequency of high-velocity duration time observed in the trajectory of individual MnO2 nanoparticles, a is a constant that represents the baseline value of the count. is the fitting parameter representing the characteristics of the high-velocity events, where higher values indicate a greater frequency of high-velocity events. represents the duration time of high-velocity events.
